# Supplementary material for: Genome Diversification Mechanism of Rodent and Lagomorpha Chemokine Genes
Source: Hindawi journal article supplement (doi:10.1155/2013/856265), 2013-01-01
Supplement: f1 [file 856265.f1.pdf]

has, human  
mmu, mouse  
rno, rat  
ocu, rabbit  
cpo, guinea pig  
itr, squirrel

>hsaCXCL8 ENSG00000169429 chr4  
mtsklavallaafalisaalcegAVLPRSAKELRCQCIKTYSKPFHPKFIKELRVIESGPHCANTEIIVKL  
SDGRELCLDPKENWVQRVVEKFLKRAENS

>hsaCXCL6 ENSG00000124875 chr4  
mslpssraarvpgpsglcallallllltppgplasAGPVSAVLTELRCCTCLRVTLRVNPKTIGKLQVFP  
AGPQCSKVEVVASLKNGKQVCLDPEAPFLKKVIQKILDSGNKKN

>hsaCXCL4L1 ENSG00000109272 chr4  
mssaarsrltratrqemlflallllpvvafaraEAEEDGDLOCLCVKTTTSQVRPRHITSLEVIKAGPHC  
PTAQLIATLKNGRKICLDLQALLYKKIIEHELES

>hsaCXCL1 ENSG00000163739 chr4  
maraalsaapsnprllrvallllllvaagrraagASVATELRCQCLQTLQGIHPKNIQSVNVKSPGPHCA  
QTEVIATLKNGRKA CLNPASPIVKKIIEKMLNSDKSN

>hsaCXCL4 ENSG00000163737 chr4  
mssaagfcasrpgllflgllllplvvafasaEAEEDGDLOCLCVKTTTSQVRPRHITSLEVIKAGPHCPTA  
QLIATLKNGRKI CLDLQAPLYKKIIEKLLLES

>hsaCXCL7 ENSG00000163736 chr4  
mslrlldttpscnsarpplhalqvllllslllitalasSTKGQTKRNLAKGKEESLSDSDLYAELRCMCIKTTS  
GIHPKNIQSLEVIGKGTHCNQVEVIATLKDGRKI CLDPDAPRIKKIVQKLAGDESAD

>hsaCXCL5 ENSG00000163735 chr4  
msllssraarvpgpssslcallvllllltqpgpiasAGPAAAVLRELCVCLQTTQGVHPKMISNLQVFA  
IGPQCSKVEVVASLKNGKEI CLDPEAPFLKKVIQKILDGNGKEN

>hsaCXCL3 ENSG00000163734 chr4  
mahatlsaapsnprllrvallllllvaasrraagASVVTELRCQCLQTLQGIHLKNIQSVNVRSPGPHCA  
QTEVIATLKNGKKA CLNPASPMVQKIEKILNKGSTN

>hsaCXCL2 ENSG00000081041 chr4  
maratlsaapsnprllrvallllllvaasrraagAPLATELRCQCLQTLQGIHLKNIQSVKVKSPGPHCA  
QTEVIATLKNGQKA CLNPASPMVKKIIEKMLKNGKSN

>hsaCXCL9 ENSG00000138755 chr4  
mkksqvlflgillvligvqgTPVVRKGRCSICISTNQGTIHLQSLKDLKQFAPSPSCIEKIEI IATLKNG  
VQTC LNPDSADV KELIKKWEKQVSQKKKQKNGKKKHQKKKVLKVRKSQRSRQKKT

>hsaCXCL10 ENSG00000169245 chr4  
mnqtailicclifltslgiqgVPLSRTVRCTCISISNQPVNPRSLEKLEIIPASQFCPRVEI IATMKKKG  
EKRCLNPESKAIKNLLKAVSKERSKRSP

>hsaCXCL11 ENSG00000169248 chr4  
msvkgmaialavilcatvvqgFPMFKRGRCLCIGPGVKAVKVADIEKASIMYPSNCDKIEVIITLKENK  
GQRCLNPKSKQARLI IKVERKNF

>hsaCXCL13 ENSG00000156234 chr4

mkfistsllllmllvsslsppvqgVLEVYYTSLRCRCVQESSVFIPRRFIDRIQILPRGNGCPRKEIIVWKK  
NKSIVCVDPAEWIQRMMEVLRKRSSSTLPVPVFKRKIP

>hsaCXCL12 ENSG00000107562 chr10  
mnakvvvvlvltalclsdgKPVSLSYRCPCRFESHVARANVKHLKILNTPNCALQIVARLKNNNRQV  
CIDPKLKWIQEYLEKALNKRFBM

>hsaCXCL14 ENSG00000145824 chr5  
msllprappvsmrllaaalllllalytarvdgSKCKCSRKGPKIRYSDVKKLEMKPKYPHCCEKMVII  
TTKSVSRYRGQEHCLHPKLQSTKRFIKWYNANWNEKR RVYEE

>hsaCXCL16 ENSG00000161921 chr17  
msgsqsevapsqpsrspemgrdlrpgsrvlllllllllvytqpgngNEGSVTGS CYCGKRISSDSPPS  
VQFMNRLRKHLRAYHRC LYTRFQLLSWSVCGGNKDPWVQELMSCLDLKECGHAYSGIVAHQKHLPTSP  
PISQASEGASSDIHTPAQMLLSTLQSTQRPPTLPVGSLSDDKELTRPNETTIHTAGHSLAAGPEAGENQKQ  
PEKNAGPTARTSATVPVLCCLAIIFILTAALSYVLCRRRGQSPQSSPDLPVHYIPVAPDSNT

>hsaCXCL17 ENSG00000189377 chr19  
mkvlisslllllpmlmsmvssSLNPGVARGHRDRGQASRRWLQEGGQECCECKDWFLRAPRRKFM TVSGL  
PKKQCP CDHFKGNVKKTRHQRHHRKPNKHSRACQQFLKQCQLRSFALPL

>hsaCCL2 ENSG00000108691 Chr17  
mkvsaallcllliaatfipqglaQPDAINAPVTCCYNFTNRKISVQRLASYRRITSSKCPKEAVIFKTIV  
AKEICADPKQKVVQDSMDHLDKQTQTPKT

>hsaCCL7 ENSG00000108688 Chr17  
mkasaallcllltaafspqglaQPVGINSTTCCYRFINKKIPKORLESYRRITSSHC PREAVIFKTKL  
DKEICADPTQKVVQDFMKHLDKKTQTPKL

>hsaCCL11 ENSG00000172156 Chr17  
mkvsaallwllliaafspqglaGPASVPTTCCFNLANRKIPLQRLLESYRRITSGKCPQKAVIFKTKLAK  
DICADPKKKVVQDSMKYLDQKSPTPKP

>hsaCCL8 ENSG00000108700 Chr17  
mkvsaallclllmaatfspqglaQPDVSIPITCCFNVINRKIPIQRLLESYTRITNIQCPKEAVIFKTKR  
GKEVCADPKERWVRDSMKHLDQIFQNLKP

>hsaCCL13 ENSG00000181374 Chr17  
mkvsavllclllmtaafnpqglaQPDALNVPSTCCFTFSSKKISLQRLKSYVITTSRCPQKAVIFRTKLG  
KEICADPKKVVQNYMKHLGRKAHTLKT

>hsaCCL1 ENSG00000108702 Chr17  
mqiittalvclllagmwpedvdsKSMQVPFSRCCFSFAEQEIPLRAILCYRNTSSIC SNEGLIFKLRGK  
EACALDTVGVVQRHRKMLRHCP SKRK

>hsaCCL5 ENSG00000161570 chr17  
mkvsaalaviliatalcapasaSPYSSDTPCCFAYIARPLPRAHIKEYFYTSKGCSNPAVVFVTRKNR  
QVCANPEKKVVREYINSLEMS

>hsaCCL16 ENSG00000161573 chr17  
mkvseaalsllvliliitsasrsQPKVPEWVNTPTSTCCLYEYKVLPRRLVVGYRKALNCHLP AIFVTK  
RNREVC TNPDDVVQYIKDPNLPPLPTRNLSTVKIITAKNGQPQLLSQ

>hsaCCL14 ENSG00000213494 chr17  
mkisvaaipffllitlialgTKTESSSRGPYHPSECCFTYTTTKIPRQIRIMDYETNSQCSKPGIVFITKR  
GHSVCTNPSDKVVQDYIKDMKEN

>hsaCCL15 ENSG00000161574 chr17  
mkvsvaalsclmlvavlgsgaQFINDAETELMMSKLPLENPVVLSFHF AADCCTSYISQSIPCSLMKSY

FETSSECSKPGVIFLTKKGRQVCAKPSGPGVQDCMKKLPYSI

>hsaCCL23           ENSG00000167236           chr17  
mkvsvaalsclmlvtalgsqaRVTKDAETEFMMSKLPLENPVLLDMLWRRKIGPQMTLSHAAGFHATSAD  
CCISYTPRSIPCALLESYFETNSECSKPGVIFLTKKGRRFCANPSDKQVQVCVRMLKLDTRIKTRKN

>hsaCCL18           ENSG00000006074           chr17  
mkglaaallvltmalcscAQVGTNKELCCLVYTSWQIPQKFIVDYSETSPQCPKPGVILLTKRGRQIC  
ADPNKKWVQKYISDLKINA

>hsaCCL3            ENSG00000006075           chr17  
mqvstaalavllctmalcnQFSASLAADTPTACCFSYTSRQIPQNFIADYFETSSQCSKPGVIFLTKRSR  
QVCADPSEEWVQKYVSDLELSA

>hsaCCL4            ENSG00000129277           chr17  
mklcvtvslsllmlvaafcspalsAPMGSDPPTACCFSYTARKLPRNFVVDYETSSLCSQPAVVFQTKRS  
KQVCADPSESWVQYVVDLELN

>hsaCCL3L3          ENSG00000256515           chr17  
mqvstaalavllctmalcnqvlSAPLAADTPTACCFSYTSRQIPQNFIADYFETSSQCSKPSVIFLTKRG  
RQVCADPSEEWVQKYVSDLELSA

>hsaCCL4L1          ENSG00000205020           chr17  
mklcvtvslsllvlvaafcslalsAPMGSDPPTACCFSYTARKLPRNFVVDYETSSLCSQPAVVFQTKRG  
KQVCADPSESWVQYVVDLELN

>hsaCCL3L1          ENSG00000205021           chr17  
mqvstaalavllctmalcnqvlSAPLAADTPTACCFSYTSRQIPQNFIADYFETSSQCSKPSVIFLTKRG  
RQVCADPSEEWVQKYVSDLELSA

>hsaCCL4L2          ENSG00000197262           chr17  
mklcvtvslsllvlvaafcslalsAPMGSDPPTACCFSYTARKLPRNFVVDYETSSLCSQPAVVFQTKRG  
KQVCADPSESWVQYVVDLELN

>hsaCCL22           ENSG00000102962           chr16  
mdrlqtallvvlvllavalqateaGPYGANMEDSVCCRDYVRYRLPLRVVKHFYWTSDSCPRPGVLLTF  
RDKEICADPRVPWVKMILNKLSQ

>hsaCX3CL1          ENSG00000006210           chr16  
mapislswwllrlatfchlvtvllagQHHGVTKCNITCSKMTSKIPVALLIHYQQNQASC GKRAIILETRQH  
RLF CADPKEQWKDAMQHLDRQAAALTRNGGTFEKQIGEVKPRTPPAAGGMDES SVLEPEATGESSSLEP  
TPSSQEAQRALGTSPELPTGVTGSSGTRLPPTPKAQDGGPVGTELFVPPVSTAATWQSSAPHQPGPSLW  
AEAKTSEAPSTQDPSTQASTASSPAPEENAPSEQRVWGQGS PRPENSLEREEMGPVPAHTDAFQDWGP  
GSMHVSVVPVSSEGTSPREPVASGSWTPKAEEP IHATMDPQRLGVLITPVPDAQAATRRQAVGLLAF LG  
LLFCLGVAMFTYQSLQGCPRKMAGEMA EGLRYIPRSCGSNSYVLPV

>hsaCCL17           ENSG00000102970           chr16  
maplkmalvtlll gaslqhihaARGTNVGRECCLEYFKGAIPLRKLKTWYQTS EDCSRDAIVFVTVQGR  
AICSDPNNKRVKNAV KYLQSLERS

>hsaCCL27           ENSG00000213927           chr9  
mkgpptfcsllllslllspdptaaFLLPPSTACCTQLYRKPLSDKLLR KVIQVELQEADGDCHLQAFVLH  
LAQRSIC IHPQNPSLSQWFEHQERKLHGTLPKLNF GMLRKM

>hsaCCL19           ENSG00000172724           chr9  
malllalsllvlwtspaptlsGTNDAEDCCLSVTQKPIPGYIVRN FHYLLIKDGC RVPVAVFTTLRGRQL  
CAPPDQPVVERIIQRLQRTSAKASLALPGPVSSL

>hsaCCL21           ENSG00000137077           chr9

maqslalsllilvlafgiprtqgSDGGAQDCCLKYSORKIPAKVVRSYRKQEPSLGC SIPAILFLPRKRS  
QAE LCADPKELWVQQLMQHLDKTPSPQKPAQGCRKDRGASKTGKKGKSGKCKR

>hsaCCL26 ENSG0000006606 chr7  
mmglslasavllasllslhlgtatrgSDISKTC CFQYSHKPLPWTWVRSYEFTSNSCSQRAVIFTTKRGK  
KVCTHPRKKWVKYISLLKTPKQL

>hsaCCL24 ENSG00000106178 chr7  
maglmtivtsllflgvcaHHIIP TGSVVIPSPCCMFFVSKRIPENRVVSYQLSSRSTCLKAGVIFTTKKG  
QQFCGDPKQEWVQRYMKNLDAKQKKASPRARAVAVKGPVQRYPGNQ TTC

>hsaCCL20 ENSG00000115009 chr2  
mcctkslllaalmsvlllhlcgeseaASNFDCLGYTDRLHPKFIVGFTRQLANEGCDINAIIFHTKKK  
LSVCANPKQTWVKYIVRLLSKKVKNM

>hsaCCL25 ENSG00000131142 chr19  
mnlwllaclvagflgawapavhtQGVFEDCCLAYHYPIGWAVLRRAWTYRIQEVSGSCNLPAAIFYLPKR  
HRKVCGNPKSREVQRAMKLLDARNKVF AKLHHNTQTFQAGPHAVKKLSSGNSKLSSSKFSNPISSSKRN  
SLLISANSGL

>hsaCCL28 ENSG00000151882 chr5  
mqgrglaiavalavcaalhasaILPIASSCCTEVSHHISRLLERVNMCRIQRADGCDLAAVILHVKRR  
RICVSPHNHTVKQWMKVQAAKNGKGNVCHRKKHHGKRNSNRAHQKHETYGHKTPY

>hsaXCL2 ENSG00000143185 chr1  
mrlilallgicsltayivegVGSEVSHRRTCVSLT TQRLPVSRIKTYTITEGSLRAVIFITKRGLKVC  
DPQATWVRDVRSMDRKSNTNRNMIQTKPTGTQQSTNTAVTLTG

>hsaXCL1 ENSG00000143184 chr1  
mrlilallgicsltayivegVGSEVSDKRTCVSLT TQRLPVSRIKTYTITEGSLRAVIFITKRGLKVC  
DPQATWVRDVRSMDRKSNTNRNMIQTKPTGTQQSTNTAVTLTG

>mmuCxcl5 ENSMUSG00000029371 chr5  
mslqlrssarispsisfmrmaplaflllftlpqhlaeaAPSSVIAATELR CVCLTVTPKINPKLIANL  
EVIPAGPQCPTVEVIAKLKNQKEVCLDPEAPVIKKIIQKILGSDKKKAKRNALAVERTASVQ

>mmuCxcl7 ENSMUSG00000029372 chr5  
mgfrlrptssctracplhnlqillllglilvalapltagKSDGMDPYIELRCRC TNTISGIPFNSISLVN  
VYRPGVHCADVEVIA TLKNGQKTC LDPNAPGVKRIVMKILEGY

>mmuCxcl4 ENSMUSG00000029373 chr5  
msvaavfrglrpsellllgllflpavvaVTSAGPEESDGDLS CVCVKTISSGIHLKHITSLEVIKAGR  
CAVPQLIATLKNRRIKICLDRQAPLYKKVIKKILES

>mmuCxcl3 ENSMUSG00000029379 chr5  
mapptcrllsaalvlllllatnhqatgAVVASELRCQCLNTLPRVDFETIQSLTVTPPGPHCTQTEVIAT  
LKDGQEVCLNPQGPRLQII IKKILKSGKSS

>mmuCxcl15 ENSMUSG00000029375 chr5  
maagwsmlllavlnlgifvrpcdtQELRCCLIQEHSEFIPLKLIKNI MVIFETIYCNRKEVIAVPKNGS  
MICLDPDAPWVKATVGPITNRF LPEDLKQKEFP PAMKLLYSVEHEKPLYLSFGRPENKRIFPFPIRETSR  
HFADLAHNSDRNFLRDSSEVSLTGSDA

>mmuCxcl1 ENSMUSG00000029380 chr5  
mipatrsl lcaallllatsrlatgAPIANELRCQCLQTMAGIHLKNIQSLKVLPSGPHCTQTEVIATLKN

GREACLDPEAPLVQKIVQKMLKGVPK

>mmuCxc12 ENSMUSG00000058427 chr5  
mapptcrllsaalvlllllatnhqatgAVVASELR**CQ**CLKTLPRVDFKNIQSLSVTPPGPH**CAQTEVI**IAT  
LKGQK**VCLDPEAPLVQKIIQKILNK**GKAN

>mmuCxc19 ENSMUSG00000029417 chr5  
mksavflflgiiflegcgvrgTLVIRNAR**CSC**ISTSRGTIHYKSLKDLKQFAPSPN**CNKTEI**IATLKN**GD**  
QT**CLDPDSANVKKLMKEWEKKISQKKKQKRGKKHQKNMKNRKP**KTP**QSRRRSRKTT**

>mmuCxc110 ENSMUSG00000034855 chr5  
mnpaavifclillglsgtqgIPLARTVR**CNC**IHIDDGPVRMRAIGKLEIIPASLS**CPRVEI**IATMK**KN**  
EQ**RCLNPESKTIKNLMKAF**SQ**R**SKRAP

>mmuCxc111 ENSMUSG00000060183 chr5  
mnrkvtaialaaiiwataaqgFLMFKQGR**CLC**IGPGMKAVKMAEIEKASVIYPSNG**CDKVEV**M**CLDPR**SK  
QARLIMQ**AIEKKNFLRRQNM**

>mmuCxc113 ENSMUSG00000023078 chr5  
mrlstatlllllascclspghgILEAHYTNL**KCRC**SGVISTVVGLNIIDRIQVTPPGNG**CPKTEV**IWT**KM**  
KKVIC**VNPRAKWLQRLLRHVQ**S**KSLSSTPQAPV**SKRRAA

>mmuCxc112 ENSMUSG00000061353 chr6  
mdakvvavlalvlaalcisdgKPVLSYR**CP**CRFFESHIANV**KHLKILNTPN**CA**LQI**VARL**KNNNRQV**  
**CIDPKLW**IQ**EYLEKALN**KRLKM

>mmuCxc114 ENSMUSG00000021508 chr13  
mrllaaallllllalcaasrvdg**SKCKC**SRKGPKIRYS**DKLEMKPKYPH**CEEK**MVI**VTT**KSMSRYRQ**GE  
**HCLHPKLQSTKR**FIKWYNAWNEKR**RVYEE**

>mmuCxc116 ENSMUSG00000018920 chr11  
mrrgfgplslafflflalltlp**gdg**NQGSVAGS**CSC**DRTISSGTQIPQGTLDHIRKYLKAFHR**CPFFIR**  
FQLQSKSV**CGGSQDQWV**RELVD**CFERKE**CGTG**HGKSFHHQKHL**PQASTQ**TPEAAEGT**PSDT**STPAHSQ**ST  
QHSTLPSGALS**LNKEHTQ**PWEMTT**PSGYGLEARPEAEANEKQ**QDD**RQ**Q**EAPGAGASTPAWVPVLSLLAI**  
VFFLTAAMAYVLCNRRATQ**QNSAGLQLWYTP**VEPRP

>mmuCxc117 ENSMUSG00000060188 chr7  
mkllaspfllllpvmlmsmvfsSPNP**GVARSHGDQHLAPRRW**LLEGG**QCECKD**WFLQAPKRKATAV**LGP**  
PRKQ**CP**CDHVKGREK**NRHQKHHRKSQRPSRACQ**Q**FLKRCHLASFALPL**

>mmuCc12 ENSMUSG00000035385 Chr11  
mqvpvmlglftvagwsihvla**QPD**AVNAPLT**CCYSFTSKMIPMSRLESYKRITSSR**CP**KEAVV**FVTKL  
KRE**V**CA**DPKKEWVQ**TYIKNLDR**NQMRSEPTTLFKTASALRSSAPLN**VKL**TRKSEANASTTFSTTTSSTSV**  
GVTSVTVN

>mmuCc17 ENSMUSG00000035373 Chr11  
mrisatllcllliaaafsiqvwa**QPD**GNAST**CCYVKKQKIPKRN**LKSYRRITSS**RCPWEAVI**FKTKKGM  
EV**CAEAHQK**W**VEEAIAYLDMKTPTPKP**

>mmuCc111 ENSMUSG00000020676 Chr11  
mqsstallfllltvtsftsqvla**HPG**SIPTS**CCF**IMTSK**KIPNTLLKSYKRITNNR**CTL**KAI**VFKTRLGK  
E**ICADPKKKWVQ**DATKHL**DQKLQTPKP**

>mmuCc112 ENSMUSG00000035352 Chr11  
mkistllcllliattispqvla**GD**AVSTPVT**CCYNVVKQKIHVRK**LKSYRRITSS**QCPREAVI**FRTILD  
KE**ICADPKKEWV**KNSINHL**DKTSQTF**ILEPSCLG

>mmuCc18 ENSMUSG00000009185 Chr11  
mkiyavllcllliavpvs**PEKLTGPDKAPVTCCF**HVLK**LKIPLRVL**KSYERINNI**QCPMEAVV**FQTKQGM

SLCVDPTQKVVSEYMEILDQKSQILQP

>mmuCc11 ENSMUSG00000020702 Chr11  
mkptamalmc1llaavwiqdvdsKSM LTVSNSCCLN TLKKE LPLKFIQCYRKMGS SCPDPPAVV FRLNKG  
RESCASTNKTVVQNHLKKNPC

>mmuCc15 ENSMUSG00000035042 chr11  
mkisaaaltiiltaaactpapaSPYGS DTPCCFAYLSLALPRAHVKEYFYTSSKCSNLAVV FVTRRNR  
QVCANPEKKVWQ EYINYLEMS

>mmuCc19 ENSMUSG00000019122 chr11  
mkpfhtalsflilttalgiwaqithaTETKEVQSSLKAQQGLEIEMFHMGFQDSSDCCLSYNSRIQC SRF  
IGYFPTSGGCTRPGIIFISKRGFQVCANPSDRRVQRCIERLEQNSQPRTYKQ

>mmuCc16 ENSMUSG00000018927 chr11  
mrnsktaisffilvavlgsgaGLIQEME KEDRRYNPPIIHQGFQDTSDDCCFSYATQIPCKRFIYYFPTS  
GGCIKPGIIFISRRGTQVCADPSDRRVQRC LSTLKQGPRSGNKVIA

>mmuCc13 ENSMUSG0000000982 chr11  
mkvsttalavllctmtlcnqvfsAPY GADTP TACCFSYSRKIPRQFIVDYFETSSLCSQPGVIFLTKRNR  
QICADSKETVWQ EYITDLELNA

>mmuCc14 ENSMUSG00000018930 chr11  
mklcvlsalsllllvaafcpgfsAPMGSDPPTS CCFSYTSRQLHRSFVMDYYETSSLCSKPAVVFLTKRG  
RQICANPSEP VVTEYMSDLELN

>mmuCc122 ENSMUSG00000031779 chr8  
matlrvplllvalvllavaigt sdaGPYGANVEDSICCQDYIRHPLPSRLVKEFFWTSKSKCRKPGVVLITV  
KNRDI CADPRQVWVKLLHKL S

>mmuCx3c11 ENSMUSG00000031778 chr8  
mapsplawllrlaaffhlctllPQHLGMTKCEIMCDKMTSRIPVALLIRYQLNQESCGKRAIVLETTQH  
RRFCADPKEKVVQDAMKHLHDQAAALTKNGGKFEKRVDNVTPGITLATRGLSPSALTKPESATLEDLAL E  
LTTISQEARGTMGTSQEP PAAVTGSSLS TSEAQDAGLTAKPQSIGSFEAADISTTVWVSPAVYQSGSSSW  
AEEKATESPSTTAPSPQVSTTSPSTPEENVGSEGQPPWVQGDLSPEKSLGSEEINPVHTDNFQERGPGN  
TVHPSVAPISSEETPSPELVASGSQAPKIEEPIHATADPQKLSVLITPVPDTQAATRRQAVGLLAFLGLL  
FCLGVAMFAYQSLQGCPRKMAGEMVEGLRYVPRSCGSNSYVLVPV

>mmuCc117 ENSMUSG00000031780 chr8  
mktftsafgtmrslqmlllaalllgtflqharaARATNVGRECCLDYFKGAIPIRKLVSWYKTSVECSR D  
AIVFLTVQGLICADPKDKHVKKAIRLVKNPRP

>mmuCc127a ENSMUSG00000073888 chr4  
meglspasslp1lllllspapeaaLPLPSSTS CCTQLYRQPLPSRLLRRIVHME LQEADGDCHLQAVVLH  
LARRSV CVHPQNRSLARWLERQ GKRLQGTVP SLNLVLQKKMYSNPQQQN

>mmuCc121b ENSMUSG00000094065 chr4  
maqmntslsllslvlalcipwtqgSDGGGQDCCLKYSQKKIPYSIVRGYRKQEPSLGCPIPAIFLPRKHS  
KPELCANPEEGVWQNL MRRLDQPPAPGKQSPGCRKNRGTSKSGKKGKSGKCKRTEQTQPSRG

>mmuCc119b ENSMUSG00000095348 chr4  
mlprlasiswahvilhlsfppaptlgGANDAEDCCLSVTQRPIPGNIVKAFRYLLNEDGCRVPAVVFTTL  
RGYQLCAPPDQLVWDRIIRRLKTS SAKASLTLLSPASTLPTPRDSSS

>mmuCc121d ENSMUSG00000073878 chr4  
maqmntslsllslvlalcipwtqgSDGGGQDCCLKYSQKKIPYSIVRGYRKQEPSLGCPIPAIFLPRKHS  
KPELCANPEEGVWQNL MRRLDQPPAPGKQSPGCRKNRGTSKSGKKGKSGKCKRTEQTQPSRG

>mmuCc127c ENSMUSG00000073877 chr4

meglspasslp1llllllspapeaaLPLPSSTS CCTQLYRQPLPSRLLRRIVHMELQEADGD CHLQAVVLH  
LARRSV CVHPQNRSLARWLERQGKRLQGTVP SLNLVLQKKMYSHPQQQN

>mmuCc121c ENSMUSG00000095675 chr4  
maqmntslsllslvlalcipwtqgSDGGGQD CCLKYSQKKIPYSIVRGYRKQEPSLGCPIPAI LFLPRKHS  
KPEL CANPEEGWVQNL MRRLDQPPAPGKQSPGCRKNRGT SKSGKKGKSGKGC KRTEQTQPSRG

>mmuCc119c blastsearch chr4  
mlprlasiswahvilhlsfppaptlgGANDAED CCLSVTQRPIPGNIVKAFRYLLNEDG CRVPAV VFTTL  
RGYQLCAPPDQF WVDRI IRRLLK KSSAKASLTLLSPASTLPTPRDSSS

>mmuCc127b ENSMUSG00000096826 chr4  
mmeglspasslp1llllllspapeaaLPLPSSTS CCTQLYRQPLPSRLLRRIVHMELQEADGD CHLQAVVL  
HLARRSV CVHPQNRSLARWLERQGKRLQGTVP SLNLVLQKKMYSHPQQQN

>mmuCc121e ENSMUSG00000096596 chr4  
maqmntslsllslvlalcipwtqgSDGGGQD CCLKYSQKKIPYSIVRGYRKQEPSLGCPIPAI LFLPRKHS  
KPEL CANPEEGWVQNL MRRLDQPPAPGKQSPGCRKNRGT SKSGKKGKSGKGC KRTEQTQPSRG

>mmuCc119 ENSMUSG00000071005 chr4  
maprvtp1llafsl1vlwtfpaptlgGANDAED CCLSVTQRPIPGNIVKAFRYLLNEDG CRVPAV VFTTLR  
GYQLCAPPDQF WVDRI IRRLLK KSSAK NKGNS TRRSPVS

>mmuCc121a ENSMUSG00000094686 chr4  
maqmntslsllslvlalcipwtqgSDGGGQD CCLKYSQKKIPYSIVRGYRKQEPSLGCPIPAI LFSPRKHS  
KPEL CANPEEGWVQNL MRRLDQPPAPGKQSPGCRKNRGT SKSGKKGKSGKGC KRTEQTQPSRG

>mmuCc126 ENSMUSG00000070464 chr5  
mfffdlgllvllaiflsvqlgvaTCGSSIAMSCC PNFYSYVIPWSWVYSYKFTDKS CTS DGV IFFTKTGKQ  
FCVQPGAKWVQR FISLVNTRNHL

>mmuCc124 ENSMUSG00000004814 chr5  
magsativagllllvacaccifpidsVTIPSS CTSFISKKIPENRVVSYQLANGSICPKAGVIFITKKG  
HKI C TDPKLL WVQRHIQKLD AKNQPSK GAKAVR TKFAVQRRRGNSTEV

>mmuCc120 ENSMUSG00000026166 chr1  
macggrllflalawvllahlcsqae aASNYD CCLSYIQ TPLPSRAIVGFTRQMADEA CDINAI I FHTTK  
RKSVCADPKQN WVKRAVNLL SLRVKKM

>mmuCc125 ENSMUSG00000023235 chr8  
mklwlfac1vacfv gawmpvha QGAFED CCLGYQHRIKWNVLRHARNYHQEVS GSCNLRAV R FYFRQK  
VVCGNPEDMNVKRAMRILTARKRLVHWKSAS DSQTERKKS NHMKS KVENPNSTSVRSATLGHP RMVMMPR  
KTNN

>mmuCc128 ENSMUSG00000074715 chr13  
mqgagltl mavavcvafqtse aILPMASS CTEVSHHVSGRLLERVSSCSIQRADGD CDLAAV I LHVKRR  
RIC ISPHNRTLKQW MRASEVKKNGRENVCSGKKQPSRKDRKGHTTRKHRTRGTHRHEASR

>mmuXc11 ENSMUSG00000026573 chr1  
mrl1lllftlfgvccltpwvve gVGTEVLEESS CVNLQ TQRLPVQKIKTYI IWEGAMRAV IFVTKRGLKI CA  
DPEAK WVKAAIKTV DGRAS TRKNMAETVPTGAQRSTSTAITLTG

>rnoCxc16 ENSRNOG00000002843 chr14  
msfqlrssaripsrscssftllaflllftlpqhraqa APFSAMVATELR CVCLTLAPRINPKMIANLEVI  
PAGPH C PKVEV IAKLKNQKDNV CLDPEAPLIKKVIQKILG SENKKTARNALALVRSASTQ

>rnoCxc17 ENSRNOG00000002829 chr14  
mgfrrlptssctrasslrnlqvllslllvalvplavgKPDNNEPFIELRCRCNTNTLSGIPLNSISRVNVF  
RPGAHCNDVEVIATLKNNGKEVCLDPTAPMIKKIVKKILEGY

>rnoCxc14 ENSRNOG00000028015 chr14  
msaaavfrglrpspelllllgllllpavvavtraSPEESDGDLSVCVCKTSSSRIHLKRITSLEVIKAGPH  
CAVPQLIATLKNNGSKICLDRQVPLYKKIICKLLES

>rnoCxc13 ENSRNOG00000028043 chr14  
mapptrrllnaalllllllmatshQPSGTVVARELRCQCLKTLPRVDFENIQSLTVTPPGPHCTQTEVIA  
TLKDGQEVCLNPQAPRLQKIIQKLLKSPSL

>rnoCxc115 EDL88572.1 chr14  
maarlwpmfllaifnlgifaappcdtEELRCQCIQITSESIKPKFIKTIEVIYENIYCNRMEVIAVLRDGN  
AICLHPNSTCVRTLIDNIPSRPFIPKDYASANNLRGMKFMYSVEFEKLLYLSFMPEQV

>rnoCxc11 ENSRNOG0000002802 chr14  
mvsatrsl1caalllllatsrqatgAPVANELRCQCLQTVAGIHFKNIQSLKVMPPGPHCTQTEVIATLKN  
GREAOLDPEAPMVQKIVQKMLKGVPK

>rnoCxc12 ENSRNOG0000002792 chr14  
mapptrqllnavlvlllllatnhqgtgVVVASELRCQCLTTLPRVDFKNIQSLTVTPPGPHCAQTEVIAT  
LKDGHEVCLNPEAPLVQRIVQKILNKGKAN

>rnoCxc19 ENSRNOG00000022242 chr14  
mksvalfmgiifldhcgvrqTLVIRNQRCSICISTSQGTFFHYKSLKDLKQFAPSPNCNKTEIATLKNGD  
QTCLDPDSARVKKLMKEWEKKISQKKKQKRGKNHQRSKKTTRAKTPHHPESKKA

>rnoCxc110 ENSRNOG00000022256 chr14  
mnpaaavvlclvllslsgtqgIPLARTVRCCTCIDFHEQPLRPRAIGKLEIIPASLSCPHVEIATMKKN  
EKRCNPESEAIKSLKAVSQRRSKRAP

>rnoCxc111 ENSRNOG00000022298 chr14  
mnrtgmavalamiawattvpgFVMFKGGRCLCIDRGVKKVVKMAAIKEVSVIYPSNGCDKVEVIVTLKAHK  
GQRCCLDPTSKQARLIMQTIQKKNFLRRQNM

>rnoCxc113 ENSRNOG00000024899 chr14  
mrlctaallllllaiclpqghgILETHYTNLKCRCISKVSSTFINLILVDWIQVIRPGNGCPKTEIIFWTKA  
KKAICVNPTARWLPKVLKVFVRSITSTPQAPVSKKRAA

>rnoCxc112 ENSRNOG00000013589 chr4  
mdakvvavlaalvlaalcisdgKPVSLSYRCPCRFESHVARANVKHLKILNTPNCALQIVARLKSNNRQV  
CIDPKLKWIQEYLDKALNKRLKM

>rnoCxc114 ENSRNOG00000011984 NP\_001013155.1 chr17  
mrl1aaallllllalcaasrvdgSKCKCSRKGPKIRYSDVKKLEMKPKYPHCEEKMIITTKSMSRYRGQE  
HCLHPKLQSTKRFIKWYNAWNEKR RVYEE

>rnoCxc116 ENSRNOG00000026647 chr10  
mrrgfgplaltlflfffalltlpgdgNQGSVAGSCYCDRTIPSGTQIPPATLNHMRKYLKTFHRCQFFIR  
FQLQSKSVCGGSQDQWVRELVNCFEHKQCGIGHGQSFHHQKHVPQASTRIPEATEGKPPDTSTAVQFQST  
QQSTFPSPGAPSLNKELTRHWETTILPSGYGLEARPVAEANEKQHKQOKEPGAGAGTQALVPVLSLLAIVF  
FLVAAMVCVLCNRRVTRQSSSGLQLCYTPVEPRPQGL

>rnoCxc117 ENSRNOG00000037814 chr1  
mkllaspfllllltgmftatvssSPNQEVARHHGDQHQAPRRWLWEGGQECDCKDWSLRVSKRKTAVLEP  
PRKQCPCDHVKGSEKKNRRQKHHRKSQRPSRTCQQFLKRCQLASF TLPL



>rnoCcl2 ENSRNOG00000007159 Chr10  
mqvsvtllgllftvaaCSIHVLSQPDAVNAPLTCCYSFTGKMIPMSRLENYKRITSSRCPKEAVV FVTKL  
KREICADPNKEWVQKYIRKLDQNQVRSETTVFYKIASLRLTSAPLNVNLTHKSEANASTLFSTTTSSSTSV  
EVTSMTEN

>rnoCcl7 ENSRNOG00000000239 Chr10  
mqisaallcvlltaaftvhvwaQPDGTNSSTCCYVKKQKIPKRNLSYRKITSSRCPWEAVIFKTKKGM  
EVCAEAHQKWVEEAIAYLDMKTSTPKP

>rnoCcl11 ENSRNOG00000007335 Chr10  
mqlstallfllltatsftsqvlaHPGSIPTSCCFTMTSKKIPNTLLKSYKRITNNRCTLKAI VFKTKLGG  
EICADPKKKWVQDATKHL DQKLQTPKP

>rnoCcl12 ENSRNOG000000029768 Chr10  
mkistllcllliaaaispqvlaGPDVSVFTPVTCCYNVAKQKIHIRRLKSYRKITSSQCPREAVIFRTVLD  
KELCADPKEKWVKDSMNHL DQKSRTQHP

>rnoCcl1 ENSRNOG000000021851 Chr10  
mkl1nmvlvcllvaamw1qnvdsKSMHVSSRCLNTLENKIALKFIKCYKEIGPSCPYYPAVIFRLIKG  
RESALNTNTTWVQDYLLKVKPC

>rnoCcl5 ENSRNOG000000010906 chr10  
mkistaasltvilvaaalctpapaSPYGS DTPCCFAYLSLALPRAHVKEYFYTSSKCSNLAVV FVTRRN  
RQVCANPEKKWVQEYINYLEMS

>rnoCcl9 ENSRNOG000000028548 chr10  
mkpfhtalsflifaatlgiqai vhaTETREVLKAEQGHQLFSLGFQDSSDCCLSYTSRVHCSRYKNYFP  
TSGGCTKPAIIFVSKKGTLCANPSDLRVQKCIKRLEQNSQPQIYKQ

>rnoCcl6 ENSRNOG000000030021 chr10  
mrhsktaisffilvav1gsqaGLIQD TVKEDRPFNP TIIHQGFQDSSDCCFSYASQIPCSRFIYYFPTSG  
GCTKPGIIFVTRKRKRVCANPSDQRVQTCISTLKLGP RSGNSAIA

>rnoCcl3 ENSRNOG000000011205 chr10  
mkvstaalavllctmalwnevf sAPYGADTP TACCFSYGRQIPRKF IADYFETSSLCSQPGVIFLTKRNR  
QICADPKETWVQEYIT ELELNA

>rnoCcl4 ENSRNOG000000011406 chr10  
mklyvsafsl1lllvaafcdsvlsAPIGSDPPTS CCFSYTSRKIHRNFVMDYYETSSLCSQPAV VFLTKKG  
RQICADPSEPWVNEYVNDLELN

>rnoCcl22 ENSRNOG000000016535 chr19  
maslrvp11valvllavalqtsda GPYGANVEDSICCQDYIRHPLPPRFVKEFYWTSKSCRKPGVVLITI  
KNRDI CADPRMLWVKKILHKL A

>rnoCx3c11 ENSRNOG000000016326 chr19  
mapsq1aw11rlaaffhlctllag QHLGMTKCNITCHKMTSPIPVTLLIHYQLNQESCGKRAI ILETRQH  
RHF CADPKEKWVQDAMKHL DHQTAALTRNGGKFEKRVDNVT PRITSTTRGLSPTALAKPESATVEDLTLE  
PTAISQEARRPMGTSQEPPAAVTGSFPSTSKAQDAGLAAKQSTGISEVA AVSTTIW PSSAVYQSGSSLW  
AEEKATESPPTIALSTQVSTTSSPKQNVGSEGQPPWVQE QDSTPEKSPGPEETNPVHTDIFQDRGPGSTV  
HPSVAPTSSEKTPSPELVASGSQAPKVEEPIHATADPQKLSVFITPVPDSQAATRROAVGLLAFLLG LFC  
LGVAMFAYQSLQGCPRKMAGEMVEGLRYVPRSCGSNSYVLPV

>rnoCcl17 ENSRNOG000000016278 chr19  
mmslqml1llaalllgtslqhasa ARATNVGRECLDYFKGAIPIRKLV TWFRTSVE CPRDAI V FETVQGR  
LIC TDPKDKHVKKAIRHLKNQRL

>rnoCcl27 ENSRNOG000000039530 chr5  
meg1sltgs1pl1llllspvpea ALPLPSS TSCCTQLYRQPLP TRLLRRIVRVELQEADGDCHLQAVVLH

LTRRSV**C**VHPQNRSLARWLERHKGRLQGTLP~~SLNPVLQKKMCPSPQKQK~~

rnoCcl19            ENSRNOG00000015668            chr5  
masrvtpllafslvlwtfsa**p**algGANDAED**C**CLSVTQRP**I**PGN**I**VKA**F**RYLL**I**QD**G**CR**V**PA**V**F**T**TLR  
GYQL**C**APLD**Q**P**W**VER**I**IRRL**K**KSS**S**K**S**KG**G**ST**K**R**G**P**V**S

>rnoCcl21            ENSRNOG00000034290            chr5  
maqmlalsllslvlvlcvpwt**q**gSDGGG**Q**D**C**CL**R**YS**Q**KK**I**P**Y**N**I**VR**G**YR**K**Q**E**PS**L**G**C**PI**P**AI**L**F**A**PR**K**Q**S**  
Q**P**EL**C**AN**P**EE**A****W**V**Q**K**L**MRRLD**Q**PP**A**P**G**K**Q**NC**R**KN**R**G**T**SK**S**G**K**K**G**R**G**S**K**G**C**K**G**TE**Q**T**D**SK**R**V**S**Q

>rnoCcl26            ENSRNOG00000001444            chr12  
mktfslgpivllavflsvqlgvat**c**ESEMP**M**P**C**CS**Y**F**S**H**Y**V**I**P**W**H**W**L**Y**S**Y**Q**I**T**D**SS**C**P**N**E**G**V**I**F**T**TK**T**G**K**  
Q**Y****C**V**Q**P**G**D**K****W**V**Q**R**Y**I**S**LL**N**A**K**K**H**W

>rnoCcl24            ENSRNOG000000031162            chr12  
magsttiaslllllvactcc**I**C**P**T**G**SV**T**IP**S**S**C**C**V**T**F**IS**K**K**I**P**V**NR**V**IS**Y**Q**L**AN**G**SI**C**P**K**AG**V**I**F**IT**K**K**G**  
H**K**I**C**T**D**PK**L**P**W**V**Q**K**H**I**K**N**L**DA**K**R**N**Q**P**SE**G**A**K**AL**G**P**K**F**V**I**Q**K**L**R**G**N**S**T**K**V

>rnoCcl20            ENSRNOG00000015992            chr9  
mackhlpflalagvllaylcsqsea**a**ASN**F**D**C**CL**T**Y**T**KN**V**Y**H**H**A**R**N**F**V**G**F**T**T**Q**M**A**D**E**A****C**D**I**NA**I**I**F**H**L**K**S**K  
R**S**V**C**AD**P**K**Q**I**W**V**K**R**I**L**H**L**L**S**L**R**T**K**K**M

>rnoCcl25            ENSRNOG000000028531            chr12  
mklqlfaclaacfvagawpvvra**Q**G**A**F**E**D**C**CL**G**Y**Q**PR**I**K**W**N**V**L**R**H**A**R**H**Y**H**Q**E**V**S**G**S****C**N**L**RA**V**I**F**Y**F**R**Q**K  
V**V**V**C**GN**P**ED**K**D**V**K**R**AV**K**IL**T**AR**K**Q**P**V**H**SP**Q**K**S**T**S****D**Y**P**TER**K**K**S**N**Y**M**K**F**K**V**E**N**P**K**G**TR**M**R**N**AT**L**G**H**P**R**M**V**M  
M**S**R**K**T**N**N

>rnoCcl28            ENSRNOG00000017547            chr2  
mqqagltlvavavcvafirtse**a**IL**P**IA**S**S**C**TE**V**SH**H**I**P**RR**L**L**E**R**V**NS**C**S**I**Q**R**AD**G**D**C**DL**A**AV**I**L**H**V**K**RR  
R**I****C**V**S**PH**N**PT**L**K**R**W**S**A**S**E**M**K**N**G**K**E**N**L**C**PR**K**Q**D**S**G**K**D**R**K**G**H**T**P**R**K**H**G**K**H**G**T**RR**I**H**G**T**H**G**H**E**A**P**R**

>rnoXcl1            ENSRNOG000000002964            chr13  
mrlllltflgvccfaawvve**g**VG**T**E**V**L**Q**E**S**I**C**V**S**L**R**T**Q**R**L**P**V**Q**K**I**K**T**Y**T**I**K**E**G**A**M**R**A**V**I**F**V**T**K**R**G**L**R**I****C**A  
D**P**Q**A**K**W**V**K**T**A**I**K**T**V**D**G**R**S**S**A**S**K**S**K**A**E**T**I**P**T**Q**A**Q**R**S**A**S**T**A**I**A**L**S**G**

>ocuCxc18            ENSOCUG00000011835            chr15  
mnsklavallatfllsltlcea**a**AV**L**TR**I**G**T**EL**R****C**Q**I**K**T**H**S**T**P**F**H**P**K**F**I**K**E**L**R**V**I**E**S**G**P**H**C**AN**S**E**I**I**V**K**L**  
V**D**G**R**E**L****C**L**D**P**K**E**K****W**V**Q**K**V**V**Q**I**F**L**K****R**F**K**N**K**T**Q**Q**Q**

>ocuCxc16            ENSOCUG00000011838            chr15  
msllssrasrslsgpssclcallallltppaplasa**a**GP**V**AA**V**RE**L**R**C**V**C**L**S**T**T**A**I**H**P**K**M**I**A**R**L**Q**V**I**A**A**G**  
P**Q****C**S**K**VE**V****V**AS**L**K**N**G**K**E**I****C**L**D**PE**A**PL**I**K**K**A**I**Q**K**I**L**E**S**G**N**K**E**N

>ocuCxc14            ENSOCUG00000017941            chr15  
msipeasgaprprpsrglllllgllllltvaaa**A**S**D**DP**K**E**S**E**G**D**L**H**C**V**C**V**K**T**T**S**L**V**R**PR**H**I**T**N**L**E**L**I**K**A**G**A  
H**C**P**T**A**Q**L**I**T**L**K**N**G**R**K**L****C**L**D**Q**A**A**L**Y**K**K**V**I**K**L**L**K**E**

>ocuCxc13            ENSOCUG00000024425            chr15  
PAL**T**EL**R****C**Q**C**L**Q**T**V**Q**G**I**H**L**K**N**I**Q**N**L**K**V**L**SP**G**PH**C**A**Q**TE**V**I**A**T**L**K**S**G**Q**E**A****C**L**N**PA**A**P**M****V**K**K**F**L**Q**K**R**L**S

>ocuCxc115            Blast search            chr15  
malgsspaplllaalvlgif**a**df**y**es**Q**EL**R****C**Q**C**I**Q**I**Y**S**N**F**I**SP**K**L**I**K**N**V**Q**M**I**PS**G**PY**C**S**T**KE**V**I**V**T**L**K**D**G  
R**L**I**C**L**D**PE**A**E**W**V**M**T**L**I**K**N**T**G**D**

>ocuCxc11            NP\_001075855.1            chr15

mapaacpaapsgrprflrtamlllllllaasrraagAAALTELR**CQ**CLQTVQGIHLKSIQSLKVLSPGPHC  
AQTEV**I**ATLKSGQEACLNPAAPM**VKKFLQ**KRLSKGSSN

>ocuCxcl2 ENSOCUG00000024883 chr15  
mapaacpaasrfprllrtalllllllaasrraagAPALTELR**CQ**CLQTVQGIHLKSIQSLKVLSPGPHC  
QTEV**I**ATLKSGQEACLNPAAPM**VKKFLQ**KRLSKGSSN

>ocuCXCL9 ENSOCUG00000014671 chr15  
mkkscvllflgftflvligvqgSPIMRNGR**CSC**ISSSTQGKIHLQSLKDLKQFSPSPSCGKTEI**I**ATKKDG  
TQ**I**CLNPDSTEV**KELVEK**WKKQ**SSPKKKQKKGKKQ**RKVKKSLKKS**QRPHQKTA**

>ocuCXCL10 ENSOCUG00000016280 chr15  
mnqsailifcliflftlsgtkgMPLSRTV**RTC**CINISNKPVNPRSLEKLEIIPASQSCANVEI**I**ATMKKDG  
EK**R**CLNPELKAIKKLLKAFSK**ERS**RGSS

>ocuCXCL11 ENSOCUG00000026515 chr15  
msvkgvllvlavilcattvqgFPMFKGGR**CLC**ITGPGVKAVKVADVQKATIIYPSGSCDKTEV**I**ITLKAKK  
G**QQ**CLNPRSKQASLI**IKQIERKTLRNQNV**

>ocuCXCL13 ENSOCUG00000024738 chr15  
mrltsasllftllvsslspsaqgVLEAYNTDLK**CEC**VQETANYIPIRFIDRLQIVPPGNGCPKREVI**V**WLK  
TKIAV**C**VKPHAK**WLQ**KLIQIL**QK**KTMLSTPPAPVI

>ocuCXCL16 ENSOCUG00000027827 chr19  
msrrqvrlllllaalalsvsaneGSVTGS**CHC**DQIISSSSPPNPKLMEHFRKHLRAYHR**CTAYI**RFRLHS  
RSV**CGGNHDP****VW**HELLR**CF**DR**GE**CGRAHWESLAHRKPLPSRSTQIPKYTEEASAHLPSTAQ**THL**PPTLPP  
GAHANKTTTAPPSSQ**S**LEV**GP**EAG**Q**N**Q**Q**LE**EIV**GP**AAGTSAMVPVLTLLAIT**FL**LT**GV**LMYVLCRRRGR  
SPKYSSGKP..

>ocuCXCL17 ENSOCUG00000021666 Scaffold GL018789  
mapekvlipsl1lllls1llmptvssTPHS**GV**ARGHGDQRQTSGRWLWEDG**QCE**CK**GW**FLRAPKRKLMTV  
PRLPKKHCP**CD**HFKGT**V**KK**TR**HQKSHRQPNKHSRAC**QQ**FLKRCQLAS**FAL**PL

>ocuCc12 ENSOCUG00000021710 Chr19  
mkvsatl1c1llliavafsshvlaQP**DA**VNSPVT**CC**YTFTSKTISVKRLMSYRRINSTK**CP**K**EAVI**FMTKL  
AKG**ICAD**PK**QK****WV**QDAIANLDKKMQTPKTLTSYSTTQEHTTNLSSTRTPSTTTSL

>ocuCc17 Blast search Chr19  
mqisaallc1llltvaafssqvlaQP**EG**TNSGKT**CC**YRFHNRMDPQKLRSYTLISISY**CP**REAV**I**FKTKQ  
HRE**V**CA**DP**K**W**PAQNAIAYLNKKTQTSKP

>ocuCc111 ENSOCUG00000005935 Chr19  
mkvsaallcmlvtaavfssqvlaQP**AF**VPT**CC**FSMAK**MPL**Q**R**LESYRRISGSK**CP**Q**KAVI**FKTKLAKE  
**ICAD**PK**EK****WV**QDSIKYLDQKSKT**SKP**

>ocuCc113 ENSOCUG00000013412 Chr19  
mkvsaallc1llllaaacssqalaQ**TE**TKPALTA**CC**FSFVRKRIPLQRLVSYRKTSA**CV**KEAV**I**FRTRRD  
QEL**CAD**PMQ**KWV**QDTMRVL

>ocuCc11 ENSOCUG00000013416 Chr19  
mklvpvalac1lllvamwpqdvvgK**SM**HVSSSN**CC**FSFVEKRIPLKTIHCYRRSSST**CP**YDAI**I**FKLRGGR  
ES**CA**LKTV**GW**LQGYF**KK**MK**PCL**PKGP

>ocuCCL5 ENSOCUG00000002848 chr19  
mevsaaalavlltaaalcapasaSPYASDT**TPCC**FAYISRLLPRAHVTEYFYTS**GKCS**FP**AVV**FVTRK**NR**  
Q**VCAN**PE**KKWV**REYINSLEMS

>ocuCCL14 ENSOCUG00000002849 chr19  
mkvsvaaip1llllfitpialgSRAEFSP**R**GPYHP**AECC**FSYITRVVPRQ**RIT**DY**YETS**SE**CS**KPG**I**VFIT

KKGYSICANPRDDWVQDYIRDLEK

>ocuCCL15           blastsearch                   chr19  
mklstaalslllllaavlgtaFVLHNTETRQLTRAMDRLINRRPIQGVNPIQSIMPLSSNVRPSDCCYGY  
TTRPLQCSVMEDFFETNSQCSMPAVIFITKCGKLI CANPRNNEVEECMETLKTQGTRLGPRAAAGLLY

>ocuCCL23           ENSOCUG00000000686           chr19  
mkvsvaalsflalilaaaalgsqaLVTHD TDTKQLALVVD RFDKEIVQGFHRPTDCCFSYTKRNIQCFLMQ  
DYIETSSQCSMPAVIFLTKRGQKVCADSSDERVRKCVSSSLQRDLPTRNL

>ocuCCL3           ENSOCUG00000000771           chr19  
mkvsgvalavllcamalstqvfsIPLGADTPTACCFYSISRQIPYKFIADYFETSSQCSKPGVIFLTKRG  
RQVCADISEAWVQGYINDLELNS

>ocuCCL4           ENSOCUG000000026206           chr19  
mklgvtvlsvallvaalcppahsAPMGSDPPTACCFSYTLRQLPRHFVIDYFETSSLCSQPAVVFQTKKG  
RQVCANPSESWVQYVDDLELN

>ocuCCL22           ENSOCUG000000015478           chr5  
masmqaplllaalmlllavvlqateaGPYGANVEDSVCCRDMRRLAPRVVKYFYWTS DSCRRPGVVLVTL  
KGLEICADPRLPWVKKILRKLEQ

>ocuCX3CL1          ENSOCUG000000007482           chr5  
mapiapqwillrlaafcpmlvplagQHLGVAKCSIICNNMTPKIPVALLISYQWNQESCGKPAIVLETKRH  
KRF CADPQAPWVQEAMKHLDRQAVARTPNSGTFEKQIGAVKPGASTVKPGTTAAPGGMPEPAVSEPRPTG  
DSRSPEPTPAPQEAQTTLGTSPALPAGVPSSSSGSGSLVTQKPQDGRPPVGPTGPEFVNTAPVSTAGSWQT  
SAHQHGATESPSAETPSTEHPTQALTTSPASEENLGSSESQSPGAPALSPRPGDPQSTWETVPVVAHTG  
AFQDGGAGSTAYASVVPGSSEGTSPREPAASGSWTPKAEVPHATVDPQRLGVLITPVPDSQAATRRQAV  
GLLAFLGLLFC LGVAMFAYQSLQGCPRKMAGEMVEGLRYVPRSCGANSYVLPV

>ocuCCL27           ENSOCUG000000001224           chr1  
megcsptsrllllllllsldpgavliLPPSTTCTQLYRQPLSNKLLRKVIRVELQEADGDCHLQAFVLH  
LARRSVCIHPQNRSLARWFERQGKRLQGTQPDFWVARENGLEPHKAPIKQH

>ocuCCL19           ENSOCUG000000001515           chr1  
mapgaaqllalsllvlwtslapalgGANDAEDCCLSVTQRPIPSNIVRAFRYLLVTDGCRVPAVVFTTLR  
GFQLCAPPEQPWVGRIIRRLKRISAKGKYQSS

>ocuCCL21           ENSOCUG0000000016448           chr1  
maqplalsllflvlalcipqtqgSDGGAQDCCLKYSLRKIPHKVVRSYRKQEPSLGCPI SAILFSPKRKRS  
QPEL CADPKEPWVQQLMKRLDRPPAPKKQVQACRKDGGASKSGKKGKCKSLPRTEQPQTPKGP

>ocuCCL24           ENSOCUG000000025061           chr6  
magpatiaasllllalsahhftpagavVIPSSCCMNFIPKKIPESQVVS YQLSSGSVCPRAGVIFTTKKG  
YRVC GDPKQQWVQSYVRNLVAKRRKPSTGARAPGRRPGE MRA

>ocuCCL20           ENSOCUG000000000868           chr7  
mtcgskslll salmsllllhlcskleaASNFDCLRYTECRIHPRFIVGFTQQLANEACDINAILHTKK  
NLSVCADPKKEWVKRVVHIL..

>ocuCCL25           ENSOCUG0000000025780           Scaffold GL018767  
mnswilaclvvcfvgawtpavhtQVAGISEDCCLAYHSLSWAVLQRTQGYQLOEVSGS CNLRAVRFCLKH  
RIVCGNPQDKKVQRAVKLLNTRRKSCHHSQKTLRGVPRSERKKLSSRKS WPPSSKQSSPAGSGKR NATLQ  
TAAKLGEDARSRD

>ocuCCL28           ENSOCUG000000007934           chr11  
mqcaglllvalatcvalqpseaILPFFSSCCTEVSPHLSRRLKMMVHTCHLQRADGDCDLDAVALYFGRR  
RF CVTTENHMLKEWMAQA AKKIGQRIICREKKYNKSSSRGTSVEGSM TGCHKTSS

>ocuXCL1 ENSOCUG00000012952 chr13  
mrrlllvlllcicclttsivegVGSEVPDKSICVSLTTPQLPVNRIRTYTIKEGPMKAVIFITKRGLKVCADPQAKWVKTAIKSISNKPSTRRSTTQTQPTGTQQSTRRAVTLTA

>cpoCxc18 ENSCPOG00000011103 scaffold\_1  
mpsqravlaaafllsavlcEGMVVTKLVSELRCQCICKIHTTPFHPKFIKELKVIESGPRCANSEIIVKLS  
SDNRQLCLDPKPKKWWQDVVSMFLKRTESQDS

>cpoCxc16 ENSCPOG00000020184 scaffold\_1  
mypvpgrasrtprllcallalppesrvhaGPVAAARELRCVCVTITPGVHPKMIASLQVTVSGPQC  
PNVEVVATLKNKGQICLDPEAPLIKRVIQKMLDSGNKQN

>cpoCxc17 ENSCPOG00000022396 scaffold\_1  
cpsarlhrvlgglmlslslllaalvpstngQRKRNLDGENKATKIIEELAEELRCCLCKTISAMHPSKISSVE  
VLKAGAHCPKIQVIAKLDKGGKVCCLDPDLPVKKMIQKILAGQGS

>cpoCxc11 ENSCPOG00000015206 scaffold\_1  
magaapktrfapllllllllvlgtsrraaqAPAAASELRCRCLRPVRLHPKNIQSVAVTAPGPHCHQTE  
VLATLKDGREACLDPPEAPMVQKVLQRMKLGSKAT

>cpoCxc19 XP\_003477696.1 scaffold\_5  
mkghsvsfflgiiflvlfvqgTPVMRKGRCYCINSSDDVISLKSLLKDLKQFVPSPECKTEIATKRNG  
DQTCNLNPDSTKVKKLIKQWEKKVTQKKKQKAKKYQKNKKIIVKRSKAPCQEKNT

>cpoCxc110 ENSCPOG00000002046 scaffold\_5  
mnhntilifclifltslsgtqgIPHSRTIRCTCIETSTQPVNPKSFKKLEIIPASQSCPRVEIATMKMNG  
EKRCCLDPESKVIKNLLKAVRKERRSKRS

>cpoCxc111 ENSCPOG00000012442 scaffold\_5  
mnmkglvivlamilsatvvqgFPMFKRGRCLCIGPLRAVKVADIKASIIYPSNSCDKIEVIITLKAHK  
GQRCLNPRSKQAGLIQOVERKNSLKH

>cpoCxc113 ENSCPOG00000001379 XP\_003477708.1 scaffold\_5  
mrlsavallsvlisslspgqgILEAYNTNLKCRCMQETSQVVRIPNIHRLRILPPGNGCPKTQIILQLR  
NKTLVCLNPAAKWVQFVARVKSARNFHSTAAAPVMKKVP

>cpoCxc112 ENSCPOG00000014912 scaffold\_62  
mdakvvavlaalclgdgKPVLSYRCPCRFFESHVARANVKHLKILNTPNCALQIVARLKNNNRQV  
CIDPKLKWIQEYLEKALNKGRRREDKMGKKEKIGKKRQKRRKAAQKRKN

>cpoCxc117 ENSCPOG000000021240 scaffold\_80  
mkvkisflllllplmltsmvssSPKSGVARAHGEQRQASRRWLOEGSRECECKDWFQALRRKPMTPAL  
PKKQCPDHLKVNMMKSRHHKHQRKPNKHSRACQEFKQQLASIALPL

>cpoCcl2L XP\_003469662.1 scaffold\_32:12,677,940-12,679,720  
mqgssvflclllvlaatfsslllaQPVGVTPICCYVFNKRIPLKRVRGYERITSSRCPQEAVIFRTLKKN  
EVCADPTQKWVQDYIAKLDQRTQQKQNSTAPPTSKPLNIRFTTQDPKNRS

>cpoCcl2 ENSCPOG00000013468 scaffold\_32:12,677,940-12,679,720  
mqrssvllclllvieatfcsllmaQPDGVNTPTCYTFNKQIPLKRVKGYERITSSRCPQEAVIFRTLKKN  
EVCADPTQKWVQDYIAKLDQRTQQKQNSTAPQTSKPLNIRFTTQDPKNRS

>cpoCcl7 ENSCPOG00000013035 scaffold\_32:12,677,940-12,679,720  
mqviavllcllltaanfsslllaQPDGVNISTCCYKRSQRIRVQRLESYTRITSSKCPWQAVIFKTKFNR  
EICADPKQQWVQDSMKYIDKKSSTPKS

>cpoCcl11            ENSCPOG00000013470        scaffold\_32:12,677,940-12,679,720  
mkvstafclllltvsafsaqvlaHPGIPSA**CC**FRVTNKKISFQRLKSYKIITSSK**CP**QTA**IV**FEIKPDKM  
ICADPKKK**WV**QDAKKYLDQISQTTKP

>cpoCcl13            Blast search                            scaffold\_32:12,677,940-12,679,720  
mqvsasllclmltaavsvqvlaQAD**T**NETPLA**CC**LTLTHRKIPLNYLKGYELTS**DK**CPLTAV**IF**KTRRN  
IQI**CA**DP**TKK****WV**QH**AM**VYLN**DL**LKT

>cpoCcl1            ENSCPOG00000002574        scaffold\_32: 12,677,940-12,679,720  
mkvaavalvc1lllatvwaKD**V**DSMS**L**H**V**ASSR**CC**YSFVERKISHHRIQSYKGTSS**S**CPYEAV**IF**KLK**G**GR  
E**IC**AL**K**T**IE****WV**QD**YL**TK**KK**IL**RL**K**G**K

>cpoCcl5            ENSCPOG00000008852        scaffold\_32  
mkvsaaalcvilttaalcvpasa**SP**YAS**D**T**TP****CC**FAYISRALPRTHIKEYFYTSS**K**CSNLAV**V**FVTRK**NR**  
Q**V**CA**N**PE**KK****WV**REY**IN**S**L**EM**S**

>cpoCcl14            ENSCPOG00000026493        scaffold\_32  
mkvsmvtislllflitvtleTK**T**HSS**S**R**G**PFY**P**SE**CC**FSYITHAVLPYRIMGY**ET**NG**D**CPKPAV**V**FIT**T**  
K**G**H**R**I**CA**NPENE**WV**QD**YL**KD**L**E**EN**

>cpoCcl15            ENSCPOG00000026069        scaffold\_32  
mkvstaalsflilaavlg**sqa**Q**L**I**Y**G**D**K**S**IC**N**IS**N**ML**S**F**H**Q**P**AD**CC**FSY**T**SR**K**IQ**C**RL**M**E**D**Y**F**RT**S**S**G**CP  
R**P**GV**IF**L**T**KK**G**KL**V**CA**D**PS**D**RR**V**Q**D**C**I**R**N**L**T**P**T**SL**P**E**I**L**D**T**L**K**L**A

>cpoCcl23            ENSCPOG00000021606        scaffold\_32  
micmaalsfliiaaalgsqa**S**I**I**H**D**SKIREHLK**L**DD**D**FR**P**VL**H**G**F**H**Q**PAD**CC**FSY**T**SR**K**IQ**C**RL**M**E**D**Y**F**R  
T**S**S**G**CP**R**P**G**V**IF**L**T**KK**G**Q**L**V**CA**D**P**S**D**RR**V**Q**D**C**I**R**N**L**T**P**T**SL**P**E**I**L**D**T**L**K**L**A

>cpoCclN1            blastsearch                            scaffold\_32  
mktlvvgllvllctmmlcscE**Q**D**K**T**H**H**P**S**D****CC**ISF**V**T**H**Q**I**P**K**N**Q**V**V**A**Y**I**R**P**M**A**C**AS**N**T**V**F**L**T**K**T**R**K**Y**I**CA**  
N**P**S**D**H**W**V**Q**D**Y**IR**K**L**D**R**S**S

>cpoCcl3a            ENSCPOG00000026400        scaffold\_32  
meapvaaliltliltetlfsQ**S**CCAL**R**GAD**T**P**T**A**CC**FFFIS**R**K**I**PR**K**F**V**D**Y**ET**S**S**Q**CP**K**AA**V**I**F**Q**T**K**R**G  
REV**CA**D**L**R**D**T**W**V**H**E**Y**I**A**D**L**E**L**N**S**

>cpoCcl3b            ENSCPOG00000023103        scaffold\_32  
mkvsvavlaavltmtlchqvfsA**P**I**G**AN**T**P**T**A**CC**F**T**Y**A**SK**I**PR**A**Y**V**A**D**Y**ET**S**S**Q**C**S**Q**P**G**V**IF**I**T**K**R**G  
REV**CA**D**P**NE**T****WV**Q**D**Y**I**N**D**L**E**L**NA**

>cpoCcl3c            ENSCPOG00000019852        scaffold\_32  
mkvsvavlaavltmtlchqvfsA**P**I**G**AD**T**P**T**A**CC**F**T**Y**A**SK**I**PR**A**Y**V**A**D**Y**ET**S**S**Q**C**S**Q**P**G**V**IF**I**T**K**R**G  
REV**CA**D**P**NE**T****WV**Q**D**Y**I**N**D**L**E**L**NA**

>cpoCcl4a            ENSCPOG00000026388        scaffold\_32  
mkfyvtvlsllvigaa**fc**spvlsA**P**I**G**S**D**P**P**T**A****CC**F**T**Y**T**Q**R**K**L**PR**N**F**V**T**D**Y**ET**S**S**L**C**S**Q**P**A**V**V**F**Q**T**K**R**G**  
K**Q**V**CA**N**P**S**D**S**WV**Q**E**Y**V**E**Y**L**E**L**N**E**E**

>cpoCcl22            ENSCPOG00000004546        scaffold\_22  
maslqtpllavlllsvmlqatda**G**P**Y**GAN**V**E**D**S**I****CC**R**D**F**V**R**Y**PL**P**PR**V**V**K**D**F**Y**T**S**D**S**CC**R**R**A**G**V**V**L**Q**T**V**  
K**D**R**E**I**CA**N**P**K**L**P**WV**K**I**L**Q**K**L**S**P**

cpoCx3c11            ENSCPOG00000004548        scaffold\_22  
maptplsqlcllavlchlivlla**g**Q**H**G**V**V**K****CS****N**I**C**D**K**M**T**S**R**I**P**N**H**L**L**L**G**Y**R**L**N**Q**A**S**CD**K**P**A**V**I**F**E**T**K**K**H  
R**F**F**CA**D**P**K**E**K**WV**Q**E**A**R**W**H**L**D**N**R**T**H**A**L**T**T**Q**S**G**G**K**F**E**K**H**V**G**K**P**E**T**T**L**V**A**Q**G**T**S**Q**P**A**L**T**E**P**K**A**T**E**S**S**S**L**E**P**T  
A**S**S**Q**G**T**Q**R**P**T**G**T**S**P**V**L**P**V**R**V**T**G**S**L**G**T**R**L**S**L**P**S**K**A**Q**D**G**E**P**P**A**G**T**E**V**F**G**T**T**A**I**S**T**T**I**A**R**Q**R**S**A**A**D**Q**P**G**S**S**P**G**  
T**Q**E**K**A**P**S**T**L**A**P**S**I**T**P**P**S**T**E**P**T**S**T**Q**S**P**T**T**S**H**S**T**E**G**Q**P**A**W**T**Q**G**Q**T**P**T**P**E**S**S**A**G**S**E**M**G**R**L**T**H**T**D**A**F**Q**D**W**G**P**  
S**S**M**D**H**A**S**V**V**P**I**S**S**E**G**T**P**S**Q**E**P**V**L**G**S**L**I**P**K**A**E**D**P**I**H**G**T**L**D**P**Q**R**Q**V**L**I**T**P**V**P**D**T**Q**A**A**T**R**R**Q**A**V**G**L**L**A**F**L**G**L

LFCLGVSMFAYQSLQGCPRKMAGEMVEGLRYVPRSCGSNSYVLPV

>cpoCcl17 ENSCPOG00000006326 scaffold\_22  
mtslqmlflaalllqaslghshaALATNVGRECCLDYFKGAIPIRKLVSWYRTSDECPKDAIVFETVQNR  
RICSNPEDRHVKKAVRHLQSRKKSQRATAQD

>cpoCcl27 blastsearch chr1  
mkelflptsilmllllllspdpgaasLLQPITTCCTQLYRRPLPNKILRKVIWVELOEADGDCHLQAFVL  
YLTERSVCVHPKNRSLIQWLERHGRFQGTLRNPNLGL

>cpoCcl19 ENSCPOG00000002627 scaffold\_27  
marhmapllalsllvlwaslapalgGANDAEDCCLSVTLRPIPGNIVKAFRYLFITDGCVRPAVVFTTLR  
GHQLCAPPEQPVVQRIIRRLKKSFAKASRPLPSPIS

>cpoCcl21 ENSCPOG00000005431 scaffold\_27  
maqmlalrllvlvlalclitqtqgSDGGAQDCCCLKYSQKKIPYKVVRSYRKQELSLGCPMPAILFLPKKRS  
QPELCADPKEAWVQQLMKRLDNPPVQGCRCRDRGNPKAGKRGKSGCKRTEKTQGP

>cpoCcl26 ENSCPOG00000000623 scaffold\_30  
mksshlvfpillafllsqhpeAAMRAGNVAEVCCFHYSTKALPVSWVRSYKLTRSSCSCQAVIFTTKRGK  
QVCFRPKAKWVQYIS

>cpoCcl20 ENSCPOG00000010180 scaffold\_13  
mgcsgkslllaalmsvllhlcrqseaASSFDCCLRVTRHVLSPKLIVGFTQQLASEACDIDAIIFHTKK  
RLSVCADPKKGWVKRAVLVLSQKVKKM

>cpoCcl25 ENSCPOG00000007131 scaffold\_195  
mnpwllaclvaffvggwpaMHTQGVSEDCCLAYHPPLRLSVFLHARYFRWQEVSGSCNLPVAVIFHFPQP  
GRVVCGNPRDKVVRKAMRVLRTQMSQQQASNVTVQGLQARRNKENSLSKMHSIRLRHHLGNGKKNAGF  
ERDSGSGL

>cpoCcl28 ENSCPOG00000027088 scaffold\_29  
mqqmralfalavcvalqiseaILPIASSCCTEVSHRISRLLERVTVCRIQRADGCDLAAVILHVKRR  
RICISPHNHTVNQWMAQAANKNSKGNICHKKHHSKKKKGSNREKI

>cpoXcl1 ENSCPOG00000012457 scaffold\_39  
mrllllailgacclaACTIVEGVGSEVPESVCMSLRVHPLPLNRIKTYTIKEGPMRAVIFITKRELKVC  
HPEATWVKKALKSIHKSSTRRNVTQIHPTGAQQSTYTTVTLPQ

>cpoXcl2 ENSCPOG00000023218 scaffold\_39  
mrllvlailgacclaACTIVEGVGSEVPERSVCVSLTQRLPVNRIKTYTIKEGSMKAVIFITKRGFKICA  
NPEDSWVKAVRTIGKSNTR

>itrCxcl8 ENSSTOG00000003271 Scaffold JH393408.1  
mtsklvallvtcllsatlceaAVLTRIGTELRCQCIKTHSTPFHPKYIKELRVIESGPHCANSEIIVKL  
VDGRELCLNPKEKWVQKVVELFLKRAENEDP

>itrCxcl6 blast search Scaffold JH393408.1  
mslrsslsprlprsrslcallallllltpaplanagPVAADVRELRVCLSTTPGIHPKMVTNLQVI  
AAGPQCPCPKVEVVASLKNKKEVCLDPEAPLIKKIIQKILDGKNK

>itrCxcl7 ENSSTOG00000023838 Scaffold JH393408.1  
mslrpsatsfctntrgvrvlqvllllslllvtlvpsttgQRKRNLGKVESVEPYVELRCICVKTISGIHP  
SNIQNLVIRPGAHCAKVQVIATLKDGREICLDPEAPRVKKIIQKLLSEDESAA

>itrCxcl4 ENSSTOG00000013032 Scaffold JH393408.1  
 mglilrscslcphtlypgllllgllllsavvtvvr<sup>s</sup>EDPEEDREFQ<sup>CM</sup>CAKTRYKVKVKDITNLEMIKPGP  
 LCATTQM<sup>I</sup>IATLKSGSRV<sup>C</sup>LAGQVSFFKALIGKLMQR

>itrCxcl4L ENSSTOG00000014918 Scaffold JH393408.1  
 mglilrscslcpqlypgllllgllllsavvtvarg<sup>S</sup>GESK<sup>KG</sup>DGDSH<sup>CV</sup>CVKTKSKVNAENIFKLEVIKAGP  
 HCATAQM<sup>I</sup>IATLKSGRK<sup>I</sup>CLDRQVSLFKRLMKLLDS

>itrCxcl3 blast search Scaffold JH393408.1  
 martasavpraprllqvallmlllvaasrraa<sup>g</sup>APVVSELRC<sup>Q</sup>CLQTVQGIHLKNIQSVKVMSPGPH<sup>CA</sup>Q  
 TEV<sup>I</sup>IATLKNQ<sup>EA</sup>CLNPEAPL<sup>V</sup>VKKI<sup>I</sup>HKMLN<sup>NG</sup>SS

>itrCxcl15 blast search Scaffold JH393408.1  
 maaessptlllallvlgif<sup>ad</sup>pcka<sup>Q</sup>ELRC<sup>RC</sup>IQTHSDFIS<sup>P</sup>QFIETLQLIPEGV<sup>Q</sup>CSRKEI<sup>I</sup>VT<sup>L</sup>KDGO  
 LV<sup>CL</sup>DPEAK<sup>W</sup>VK<sup>T</sup>LLEK<sup>V</sup>QLR<sup>P</sup>RVLT<sup>F</sup>TFSHFYFN<sup>Y</sup>RYV

>itrCxcl11 blast search Scaffold JH393408.1  
 maraasavpraprllqvalflllllvacrraa<sup>g</sup>APVVSELRC<sup>Q</sup>CLQTVQGIHLKNIQSVKVTSPGPH<sup>CA</sup>Q  
 TEV<sup>I</sup>IATLKNQ<sup>EA</sup>CLNPEAPL<sup>V</sup>VKKI<sup>I</sup>DKMLN<sup>K</sup>SSTN

>itrCxcl2 blast search Scaffold JH393408.1  
 ..ATLKNQ<sup>EA</sup>CLNPEAPL<sup>V</sup>VKKI<sup>I</sup>HKMLN<sup>K</sup>GSN

>itrCxcl9 ENSSTOG00000013732 Scaffold JH393486.1  
 mkktgipfllgliflvlfqv<sup>g</sup>APIMRNDRC<sup>SC</sup>ISTRQGIHPKALKD<sup>I</sup>KQFAPSPSC<sup>G</sup>KTEI<sup>I</sup>ATMKNG  
 NEE<sup>CL</sup>NPDSGY<sup>V</sup>VKKV<sup>V</sup>KMWKEK<sup>VS</sup>QKKK<sup>Q</sup>KKGG<sup>Q</sup>KM<sup>K</sup>TF<sup>L</sup>KAKR<sup>P</sup>QRPH<sup>Q</sup>KK<sup>T</sup>T

>itrCxcl10 ENSSTOG00000026861 Scaffold JH393486.1  
 mnqsavfifclifltlsgt<sup>g</sup>MPLSR<sup>T</sup>TR<sup>CK</sup>CIQISNRPVNP<sup>K</sup>SLEKLELIPASES<sup>C</sup>PRVEI<sup>I</sup>ATMKKSG  
 EKRC<sup>LN</sup>PESKA<sup>I</sup>KNLLKALRIE<sup>R</sup>SKRSS

>itrCxcl11 ENSSTOG00000009504 Scaffold JH393486.1  
 mnvkgmaillavivcatite<sup>g</sup>FPMFKGGR<sup>CL</sup>CIGPGVKAVK<sup>F</sup>TDIEKASVIYPSNS<sup>C</sup>NKIEVI<sup>I</sup>ITLKAHK  
 GQR<sup>CL</sup>NPRSKQASFI<sup>I</sup>K<sup>Q</sup>VERKN<sup>FL</sup>KYRNK

>itrCxcl13 ENSSTOG00000015287 Scaffold JH393486.1  
 mrlisaallllmllvssslspvh<sup>g</sup>VLEAYNTNLK<sup>CS</sup>CVQGTSDFIHVRQIGRLQI<sup>I</sup>PPGNG<sup>C</sup>PIKQI<sup>I</sup>IRL  
 KNKTTV<sup>CV</sup>NPQTS<sup>W</sup>IKK<sup>L</sup>IEHLP<sup>K</sup>KKLFSTQAPAMKKIG

>itrCxcl12 ENSSTOG00000005950 Scaffold JH393427.1  
 mdtkvvvvvalvlaalclsd<sup>g</sup>KPVSLSYR<sup>CP</sup>CRFFESHVARVNV<sup>R</sup>H<sup>L</sup>KILNTPN<sup>C</sup>SLQI<sup>V</sup>ARLKSNNRQV  
 CIDPKL<sup>K</sup>W<sup>I</sup>QEYLEKALN<sup>K</sup>GRREEKVGKKEKIGKKRQ<sup>K</sup>KR<sup>K</sup>AAQ<sup>K</sup>RKN

>itrCxcl14 ENSSTOG00000022730 Scaffold JH393407.1  
 mrlltaallllllalcvavrd<sup>g</sup>SK<sup>CK</sup>CSRKGP<sup>K</sup>IRYSDVKKLEM<sup>K</sup>PKYPH<sup>CE</sup>EKMVI<sup>I</sup>ITKSVSR<sup>Y</sup>RQ<sup>GE</sup>  
 HCLHPKLQSTKRFIKWYN<sup>A</sup>WNEKR<sup>R</sup>VYEE

>itrCxcl16 ENSSTOG00000009339 Scaffold JH393487.1  
 mrpssgpllpeflflvlvlilp<sup>g</sup>dgNEGSVTGS<sup>CP</sup>CDERISNNPLSWQIMDHYRKYLRAYRD<sup>CP</sup>PPYIR<sup>FE</sup>  
 LIRKSV<sup>CG</sup>SIKNPS<sup>V</sup>RELMSCFDRG<sup>EG</sup>CGYERGKSRVNQGHLLFPSTPIPEPTELAPPDTSTPAQMHL<sup>P</sup>PT  
 QQSTQ<sup>Q</sup>FKLPSGVLP<sup>L</sup>DKELTHLKETTT<sup>F</sup>TVGYNLGIGFKDGEK<sup>Q</sup>RQKEEMEGTAINKSV<sup>M</sup>VAVLSLLAI  
 VFIL<sup>T</sup>GVLLYVLCRRRREQSLQ<sup>C</sup>SPGLHYTPVATVFNA

>itrCxcl17 ENSSTOG00000011599 Scaffold JH393516.1  
 ..VARGHRDQRQASGRLLKGSQ<sup>EC</sup>CK<sup>D</sup>WFLRASKKKPMTEAGLPKKRCP<sup>CD</sup>HSTVGVKKT<sup>R</sup>HRRH<sup>HK</sup>  
 SNKHSKACWQFLQRCQLESFALPL

>itrCcl2 ENSSTOG00000028166 Scaffold JH393348.1: 868,214-870,352  
 mkvsaallclmltvaafstlvlaQP<sup>D</sup>AVNSPVT<sup>CC</sup>YTLTSRKIPMKRLMSYRRVTSSK<sup>CP</sup>KEAVI<sup>F</sup>TTVL



NKEICADPLQKVVEDYVAKMDQKTEGNQNPTGLGTAAPVNAVNTTPEPVANLSATSSPSTNPNTSI

>itrCcl7

mkvsaallclmltvaafcivlaQP**D**GINIST**CC**FETRRRKVSVQKLKSYTRITSS**T**CPREAV**I**FQTKLN  
KEICADSNQ**Q**WVKDAIKHLDKKTQDP

>itrCcl11           ENSSTOG00000012718   Scaffold JH393348.1: 835,859-837,710  
mkvsavllclmltaailsmqvlaQP**A**SVPT**CC**FTVANKKFSIQRLESYRKITGSK**CP**QKAV**I**FKTKQDK  
EF**C**ADPK**Q**K**W**VKDAIKYLDQKLQTP**T**P

>itrCcl12           ENSSTOG00000023292   Scaffold JH393348.1: 805,250-806,907  
mkvsvallclvltaatvssQE**Q**A**Q**P**G**APLMPIT**CC**FSTINRRIP**I**QKLQSYTIT**ST**Q**CP**KVAV**I**FKTKRG  
K**M**ICAD**P**SEN**W**VKDSMTLLNQNSQ**T**PK**P**

>itrCcl1           ENSSTOG00000007409   Scaffold JH393348.1: 781,687-786,234  
mkltsvallclllaatwpqdvdsK**S**MHVSS**R**CC**F**SFAQKRISQKTIQCYRETS**S**T**CP**YQAA**I**FRLK**G**GR  
E**S**CALKTER**W**VQYLGKVKPCL**L**V

>itrCcl5           ENSSTOG00000015833           Scaffold JH393300.1  
mkvsaaalaviltaaafcipasa**S**PYASDT**TP**CC**F**AFISRPVPRNHIKEYFYTSS**K**CSNLAV**V**FVTRR**R**N  
Q**V**CADPE**K**K**W**VREYINSLE**M**S

>itrCcl16           blastsearch                   Scaffold JH393300.1  
mvwsvcvpslsplfiss**S**SFLLPLLSLQRPQ**T**AQRWLDPL**R**HPAGVNIQAS**CC**VTYE**K**TL**P**QKLVK**G**YR  
EAL**T**CHL**P**AI**I**FVTKKNRE**V**CANPNDS**W**VQDYIKDP**Q**IPLLPKNSAS**V**K**I**IRTEK**G**Q**P**

>itrCcl14           blastsearch                   Scaffold JH393300.1  
matvsl1111111svvleaKVPSS**R**PNP**S**E**CC**FTYVSQAPRRR**I**IDYYETS**S**E**CP**KSG**I**VFITK**G**H**P**  
I**C**ANPKDE**W**VQDYIKELE**S**

>itrCcl15           blastsearch                   Scaffold JH393300.1  
mkvsavalsflilgaalg**s**q**Q**VIP**D**PETRELLEREHT**F**Q**P**PLV**N**K**V**FNSPAD**CC**FSYITRS**I**R**C**TVM**K**T  
Y**H**K**T**SS**G**S**Q**PAV**I**FIT**N**KG**Q**H**V**CANPN**D**PS**V**Q**E**CMK**L**K**H**NP**S**

>itrCcl23           blastsearch                   Scaffold JH393300.1  
mkfsiaalsllilaaalg**s**q**R**VI**H**DLEKRQL**L**RIPIK**S**PIQ**H**GILQEAAD**CC**FIYTRRS**I**R**C**SFME**H**Y**Y**  
K**T**SS**G**CP**Q**PAV**I**FFSRKG**Q**R**I**CADPN**D**GR**V**Q**E**CMANL**N**L**N**S

>itrCcl3a           blastsearch                   Scaffold JH393300.1  
mkvlvvalfvllctltlraegES**V**HLL**L**MDENQ**E**PS**F**CC**F**AYTSRKIP**K**FVAFY**Y**ETS**S**T**CS**SK**G**I**V**F  
V**T**KRGR**H**V**C**ARP**N**E**A**W**V**Q**E**H**I**R**D**LE**G**SS**K**K**H**

>itrCcl3b           ENSSTOG00000027899           Scaffold JH393300.1  
mevpvavlavlffteals**S**L**T**CSAS**L**GAD**T**PT**ACC**FFYISRKIP**H**KFVDDY**Y**ETS**S**Q**CS**KPAV**I**FQ**T**K**R**G  
R**Q**V**C**AD**P**SE**A**W**V**RAY**I**T**D**LE**L**NA

>itrCcl3c           ENSSTOG00000027458           Scaffold JH393300.1  
..GAD**S**PT**ACC**FSYVAR**Q**I**Q**R**K**FI**E**DY**F**ET**S**S**Q**CS**Q**PG**V**I**F**L**T**KRGR**Q**V**C**AD**P**SEN**W**VQ**E**Y**I**T**D**LE**L**NA

>itrCcl4           ENSSTOG00000013313           Scaffold JH393300.1  
mklcgialplllvvaafcspals**A**P**M**GSD**P**PT**ACC**FSYTL**R**KL**P**R**N**F**V**MDY**F**ET**S**SL**CS**QPAV**V**FQ**T**K**K**G  
R**Q**V**C**AN**P**SES**W**VQ**E**Y**M**D**D**LE**L**N

>itrCcl22           ENSSTOG00000010260           Scaffold JH393285.1  
maslqapllvalill**s**valqatda**G**PYGAN**V**ED**S**I**CC**RDY**I**RL**P**L**P**Q**R**L**V**K**S**FY**W**T**S**ES**C**RRPG**V**L**Q**T**L**  
R**D**RE**I**CAN**P**K**L**P**W**V**K**R**I**I**Q**K**L**Q**E**

>itrCx3c11           ENSSTOG00000015132           Scaffold JH393285.1  
maptplawllslatlchltilva**g**Q**H**H**G**V**T**K**C**N**I**T**C**N**T**M**T**R**P**I**P**V**N**L**L**I**G**Y**W**K**N**P**E**S**C**G**R**RA**V**L**E**T**K**R**H**

KYFCADPKEK**WV**QEAMKHLNRPAQTQNGGTFEKQIGSGPTITPATTEGQSHPAFSEPEATGEGNSLEGTT  
SSQEAQRSMGTSPPELPGVTTDSSGYRSTPTSKAPEDRPPAGPGTAVASTSVAQQSQTGPGLRVIKAHSET  
HSTQVLSTPEPSTQTPDMSYPALEETTVSKGQPTSGKGQTPSPEASPGPEEMSPVSTPRGASQDSGPGEM  
THAPVVPVSSEGTPSQEPVASGSWAPKTKEPIHTTSNPQSLSNKAAPNTPDLGPQEATRQAVGLLAFLG  
LLFCLGVAMFAYQSLQGCPRKMAGEMVEGLRYVPRSCGSNSYVLPV

>itrCcl17 ENSSTOG00000015140 Scaffold JH393285.1  
msplktllllaalllgaslqsira**AR**ATNVGRE**CC**MEFFKGAIPRKLVTWYRTSAE**CP**KDAI**VL**VTMQGK  
S**IC**SDPKDRH**V**TKAVRFLQRLVKSPGPITQKP

>itrCcl27 ENSSTOG00000002852 Scaffold JH393334.1  
mkwlsptsslllllllllspdpga**a**LLLPST**CT**QLYRQPLSKLLRKVIRVELQEADG**CD**HLQAF**VL**H  
LARRSV**CI**HQPQRSLARWFERQGGKFPGRLLPA

>itrCcl19 ENSSTOG00000002862 Scaffold JH393334.1  
maprvapllalsllvlwnsp**a**palgGANDAED**CC**LSVTQRPIPRNIVKAFRYLLLTG**CR**VPAV**V**FTTLR  
GH**EL**CAPPDQ**PW**DR**I**IRRLNKSSAKASLSSQPYLQPPNPCSRFCPSHDSAYPSSHRASATAIRP

>itrCcl21 ENSSTOG000000021913 Scaffold JH393334.1  
maqtlalsllilvlalcvpwt**q**SDGGAQD**CC**LKYSQRKIPYKVVVRYRKQEASL**GC**PIPA**IL**FLPQKRS  
QPE**LC**GD**PKEA****WV**QQLMKRLDKPPAPRKEGQGCRCRDRETQKPGKKRKGSKGCKR

>itrCcl24 ENSSTOG00000004986 Scaffold JH393353.1  
magpssiiagflllalcvc**I**PT**GS**VVTP**FC**CFNFTAKKIPQKRVVSYQLTSGST**CV**QAG**VI**FTTTAG  
RK**VC**ADPSQ**LWV**QEYKKNLDSKQKQPSAEARVRGVKVRPRHRGNRTAI

>itrCcl26 blastsearch Scaffold JH393353.1  
mksfplvpillafllsvhtSV**L**RDSDEK**SC**CFQYSHKMIPWNWVQAYQFTQ**IS**CP**Q**Q**GV**IFTTKIGER  
V**CV**Q**PKEK****WV**QRYISLLEARK

>itrCcl20 blastsearch Scaffold JH393335.1  
mmcsgkslllaalvsvllhlcrese**a**ASN**FD**CC**L**RYTEKVFHHRFLVGFTQQLANE**AC**DIDAV**I**FYTKR  
KLAV**C**ADPK**KP****WV**KTAVRRL..

>itrCcl25 ENSSTOG00000003529 Scaffold JH393398.1  
mnpwilaslaacflgawvppiht**Q**GS**F**ED**CC**LGYYPKPKLAVLRRASFYRIQEVSG**SC**NLFA**I**VFYFRQP  
GKM**VC**GNPRDIR**V**RKAMRLVSQRSDNRLTIQ..

>itrCcl28 ENSSTOG00000005720 Scaffold JH393290.1  
mqqtgltlmtlavcvalrnse**a**ILPIASS**CC**TEVSHHISRLLERVNSC**RI**Q**R**ADGD**CD**LA**AV**ILHIKRR  
R**IC**VSPHNHTIKQWIRAQAAKNGKGV**CV**QKHHQ**R**NRKVVHGDKQE**AR**GL

>itrXcl1 ENSSTOG00000014588 Scaffold JH393291.1  
mrllllallgicclsactvy**g**vg**s**EVPEK**SV**CVSLSTQRLPINRIRTYTIKEGSVK**AV**IFITRRGLK**VC**A  
NPE**AE****WV**KS**AV**KS**VD**SRSTTKRSKLQSSPPTVQPTTSGTLSR

## Chemokine domains

has, human  
mmu, mouse  
rno, rat  
ocu, rabbit  
cpo, guinea pig  
itr, squirrel

>hsaCXCL8

ELRCQC IKTYSKPFHPKFIKELRVIESGPHCANTEIIVKLSDGRELCLDPKENWVQRVVEKF

>hsaCXCL6

ELRCTCLRVTTLRVNPKTIGKLQVFPAGPQCSKVEVVASLKNKGQVCLDPEAPFLKKVIQKI

>hsaCXCL4L1

DLQCLCVKTTTSQVRPRHITSLEVIKAGPHCPTAQLIATLKNRGIKICLDLQALLYKKIIEKH

>hsaCXCL1

ELRCQLQTLQGIHPKNIQSVNVKSPGPHCAQTEVIATLKNRKA CLNPASPIVKKIIEKM

>hsaCXCL4

DLQCLCVKTTTSQVRPRHITSLEVIKAGPHCPTAQLIATLKNRGIKICLDLQAPLYKKI IKKL

>hsaCXCL7

ELRCMCIKTTSGIHPKNIQSVLEVIKAGPHCNQVEVIATLKDGRKICLDPDAPRIKKIVQKK

>hsaCXCL5

ELRCVCLQTTQGVHPKMISNLQVFAIGPQCSKVEVVASLKNKKEICLDPEAPFLKKVIQKI

>hsaCXCL3

ELRCQLQTLQGIHLKNIQSVNVRSPGPHCAQTEVIATLKNRKA CLNPASPMVQKIIIEKI

>hsaCXCL2

ELRCQLQTLQGIHLKNIQSVKVKSPGPHCAQTEVIATLKNRKA CLNPASPMVKKIIEKM

>hsaCXCL9

KGRCSICSTNQGTIHLQSLKDLKQFAPSPSCEKIEIIVWKKNKSIKICLNPDSADV KELIKKW

>hsaCXCL10

TVRCTCISISNQPVNPRSLEKLEIIPASQFCPRVEIIVWKKNKSIKICLNPESKAIKNLLKAV

>hsaCXCL11

RGRCLCIGPGVKAVKVADIEKASIMYPSNCDKIEVIITLKENKQRCCLNPESKQARLI IKKV

>hsaCXCL13

SLRCRCVQESSVFIPRRFIDRIQILPRGNGCPRKEIIVWKKNKSIKICVDPQAEWIQRMMEVL

>hsaCXCL12

SYRCPCRFESHVARANVKHLKILNTPNCALQIVARLKNNNRQVCIDPKLKWIQEYLEKA

>hsaCXCL14

gSKCKCSRKGPKIRYSDVKKLEMKPKYPHCCEEKMVIITTKSVSRYRGQEHCLHPKLQSTKRFIKWY

>hsaCXCL16

TGSCYCGKRISSDSPSPVQFMNRLRKHLRAYHRCLYYTRFQLLSWSVCGGNKDPWVQELMSCL

>hsaCXCL17  
GQE**C**E**C**K**D**WFLRAPPKRFMTVSGLPKKQCP**C**DHFKGNVKK**T**R**H**QRHHRKPNKHSRACQ**Q**FLK**Q**C**Q**

>hsaCCL2  
PVT**C**CYNFTNRKISVQRLASYRRITSSK**C**PKEAV**I**FKTIVAKE**I**CADPK**Q**K**W**V**Q**DSMDHL

>hsaCCL7  
STT**C**CYRFINKKIPKQRLLESYRRITSS**H**C**P**REAV**I**FKTKLDKE**I**CADPT**Q**K**W**V**Q**DFMKHL

>hsaCCL11  
PTT**C**CFNLANRKIPLQRLLESYRRITSGK**C**PQKAV**I**FKTKLAKD**I**CADPK**K**K**W**V**Q**DSMKYL

>hsaCCL8  
PIT**C**CFNVINRKIPIQRLLESYTRITNI**Q**C**P**K**E**AV**I**FKTKRGKEV**C**ADPKER**W**V**R**DSMKHL

>hsaCCL13  
PST**C**CF**T**FSSKKISLQRLKSYVITTSR**C**PQKAV**I**FRTKLGKE**I**CADPK**E**K**W**V**Q**NYMKHL

>hsaCCL1  
FSR**C**CF**S**FAEQEIPLRAILCYRNTSS**I**C**S**NEGL**I**FKLKR**G**KEA**C**ALDTV**G**W**V**QRHRKML

>hsaCCL5  
TTP**C**CFAYIARPLPRAHIKEYFYTS**G**K**C**SNPAV**V**FVTRK**N**RQV**C**ANPE**K**K**W**V**R**EYINSL

>hsaCCL16  
PST**C**CLKYE**K**VLP**R**RLVVG**Y**RKALN**C**HLPA**I**IFVTKR**N**REV**C**TNPND**D**W**V**Q**E**YIKDP

>hsaCCL14  
PSE**C**CF**T**YTT**Y**KIPRQ**R**IMDY**E**TNS**Q**C**S**KPG**I**VFITKR**G**H**S**VC**T**NP**S**DK**W**V**Q**DYIKDM

>hsaCCL15  
AAD**C**CTSYISQ**S**IP**C**SLMKS**Y**FETS**S**EC**S**KPG**V**IFLTKR**G**RQV**C**AKPS**G**PG**V**Q**D**CM**K**KL

>hsaCCL23  
SAD**C**CI**S**YTPRS**I**P**C**SLLES**Y**FET**N**SE**C**S**K**PG**V**IFLTKR**G**RR**F**CANP**S**DK**Q**V**Q**CV**R**ML

>hsaCCL18  
KEL**C**CLV**Y**TSWQ**I**PQ**K**FIVD**Y**SET**S**P**Q**C**P**KPG**V**ILLTKR**G**RQ**I**CADPN**K**K**W**V**Q**KYISDL

>hsaCCL3  
PTA**C**CF**S**YTSRQ**I**PQ**N**FIAD**Y**FET**S**S**Q**C**S**KPG**V**IFLTKR**S**RQV**C**ADP**S**EE**W**V**Q**KYVSDL

>hsaCCL4  
PTA**C**CF**S**Y**T**ARKLPRNFVVD**Y**ET**S**SL**C**SQPAV**V**FQTKR**S**KQV**C**ADP**S**ES**W**V**Q**EYVYDL

>hsaCCL3L3  
PTA**C**CF**S**YTSRQ**I**PQ**N**FIAD**Y**FET**S**S**Q**C**S**KPS**V**IFLTKR**G**RQV**C**ADP**S**EE**W**V**Q**KYVSDL

>hsaCCL4L1  
PTA**C**CF**S**Y**T**ARKLPRNFVVD**Y**ET**S**SL**C**SQPAV**V**FQTKR**G**KQV**C**ADP**S**ES**W**V**Q**EYVYDL

>hsaCCL3L1  
PTA**C**CF**S**YTSRQ**I**PQ**N**FIAD**Y**FET**S**S**Q**C**S**KPS**V**IFLTKR**G**RQV**C**ADP**S**EE**W**V**Q**KYVSDL

>hsaCCL4L2  
PTA**C**CF**S**Y**T**ARKLPRNFVVD**Y**ET**S**SL**C**SQPAV**V**FQTKR**G**KQV**C**ADP**S**ES**W**V**Q**EYVYDL

>hsaCCL22  
DSV**C**CRDYVRYRLPLRVVKHFYWTSD**S**C**P**RP**G**V**V**LLTFRDKE**I**CADPR**V**P**W**V**K**MILNKL

>hsaCX3CL1  
VTKCNITCSKMTSKIPVALLIHYQQNQASC GKRAIILETRQHRLF CADPKEQWVKDAMQHL

>hsaCCL17  
GRECCLEYFKGAIPLRKLKTWYQTS EDCSRDAIVFVTVQGRAICSDPNNKRVKNAVKYL

>hsaCCL27  
STACCTQLYRKPLSDKLLRKVIQVELQEADGDCHLQAFVLHLAQRSICIHQPONPSLSQWFEHQ

>hsaCCL19  
AEDCCLSVTQKPIPGYIVRNFHYLLIKDGCVRPAVVFTTLRGRQLCAPPDQPWVERIQRL

>hsaCCL21  
AQDCCLKYSQRKIPAKVVRSYRKQEPSLGC SIPAILFLPRKRSQAELCADPKELWVQQLMQHL

>hsaCCL26  
SKTCCFQYSHKPLPWTWVRSYEF TSNCSQRAVIFTTKRGKKVCTHPRKKWVQKYISLL

>hsaCCL24  
PSPCCMFFVSKRIPENRVVSYQLSSRSTCLKAGVIFTTKKGQQFCGDPKQEWVQRYMKNL

>hsaCCL20  
NFDCCLGYTDRILHPKFIVGFTRQLANEGCDINAIIFHTKKKLSVCANPKQTWVKYIVRLL

>hsaCCL25  
FEDCCLAYHYPIGWAVLRRRAWTYRIQEVSGSCNLPAATFYLPKRHRKVCGNPKSREVQRAMKLL

>hsaCCL28  
ASSCCTEVSHHISRRLLE RVNMCRIQRADGCDLAAVILHVKRRRICVSPHNHTVKQWMKVQ

>hsaXCL2  
RRTCVSLTTQRLPVSRIKTYTITEGSLRAVIFITKRGLKVCADPQATWVRDVVRSM

>hsaXCL1  
KRTCVSLLTQRLPVSRIKTYTITEGSLRAVIFITKRGLKVCADPQATWVRDVVRSM

  

>mmuCxc15  
ELRCVCLTVTPKINPKLIANLEVIPAGPQCPTVEVIAKLNQKEVCLDPEAPVIKKIIQKI

>mmuCxc17  
ELRCRCTNTISGIPFNSISLVNVYRPGVHCADVEVIATLKNQKTCCLDPNAPGVKRIVMKI

>mmuCxc14  
DLSVCVVKTISSGIHLKHITSLEVIKAGRHC AVPQLIATLKNGRKICLDRQAPLYKKVIKKI

>mmuCxc13  
ELRCQCLNLTLPVDFETIQSLTVTPPGPHCTQTEVIA TLKDGQEVCLNPQGPRLQIIKKI

>mmuCxc115  
ELRCLCIQEHSEFIPLKLIK NIMVIFETIYCNRKEVIAVPKNGSMICLDPDAPWVKATVGP I

>mmuCxc11  
ELRCQLQTMAGIHLKNIQSLKVLPSGPHCTQTEVIA TLKNGREACL DPEAPLVQKIVQKM

>mmuCxc12  
ELRCQCLKTLPRVDFKNIQSLSVTPPGPHCAQTEVIAATLKGQKVCCLDPEAPLVQKIIQKI

>mmuCxc19  
NARCSCIISTSRGTIHYKSLKDLKQFAPSPNCNKTEIIATLKNQDQTCCLDPDSANVKKLMKEW

>mmuCxc110  
TVRCNCIHIDDPVVRMRAIGKLEIIPASLSCPRVEIIATMKNDEQRCLNPESKTIKINLMKAF

>mmuCxc111  
QGRCLCIGPGMAVKMAEIEKASVIYPSNGCDKVEVMCLDPRSKQARLIMQAI

>mmuCxc113  
NLKCRCSGVIISTVVGLNIIDRIQVTPPGNGCPKTEVVIWTKMKKVICVNPRAKWLRLLRHV

>mmuCxc112  
SYRCPCRFFESHARANVKHLKILNTPNCALQIVARLKNNNRQVCIDPKLKWIQEYLEKA

>mmuCxc114  
gSKCKCSRKGPKIRYSVDVKKLEMKPKYPHCCEEMVIVTTKMSRYRGQEHCLHPKLQSTKRFIKWY

>mmuCxc116  
AGSCSDRTISSGTQIQGTLDHIRKYLKAFHRCPPFIRFQLQSKSVCGGSQDQWVRELVDCF

>mmuCxc117  
GQECCKDWFLOAPKRKATAVGLGPPRKQPCDHVKGREKKNRHQKHHRKSQRPSRACQQFLKRCH

>mmuCc12  
PLTCCYSFTSKMIPMSRLESYKRITSSRCPKEAVVFVTKLKREVCADPKKEWVQTYIKNL

>mmuCc17  
ASTCCYVKQKIPKRNLKSYRRITSSRCPWEAVIFKTKKGMEVCAEAHQKVVVEEAIAYL

>mmuCc111  
PTSCCFIMTSKKIPNTLLKSYKRITNNRCTLKAIVFKTRLGKEICADPKKKWVQDATKHL

>mmuCc112  
PVTCCYNVVKQKIHVRKLKSYRRITSSQCPREAVIFRTILDKEICADPKEKWWKNSINHL

>mmuCc18  
PVTCCFHVLKLIKIPLRVLKSYERINNIQCPMEAVVFQTKQGMSLQVDP'TQKWVSEYMEIL

>mmuCc11  
SNSCCNLTLKKEPLKFIQCYRKMGSSCPDPPEAVVFRNLKGRESCASTNKTWVQNHLKKV

>mmuCc15  
TTPCCFAYLSLALPRAHVKEYFYTSSKCSNLAVVFVTRRRNRQVCANPEKKWVQEYINYL

>mmuCc19  
SSDCCLSYNSRIQCSRFIGYFPTSGGCTRPGIIFISKRGFQVCANPSDRRVQRCIERL

>mmuCc16  
SSDCCFSYATQIPCKRFIYFPTSGGCIKPGIIFISRRGTQVCADPSDRRVQRCLSTL

>mmuCc13  
PTACCFYSYRKRIPRQFIVDYFETSSLCSQPGVIFLTKRNRQICADSKETWVQEYITDL

>mmuCc14  
PTSCCFYSYTSRQLHRSFVMDYYETSSLCSKPAVVFLTKRGRQICANPSEPWVTEYMSDL

>mmuCc122  
DSICQDYIRHPLPSRLVKEFFWTSKSCRKPGVVLITVKNRDI CADPRQVWVKLLHKL

>mmuCx3c11  
MTKCEIMCDKMTSRIPVALLIRYQLNQESCGKRAIVLETTQHRRF CADPKEKVVQDAMKHL

>mmuCc117  
GRECCLDYFKGAIPIRKLVSWYKTSVECSRDAIVFLTVQGKLI CADPKDKHVKKAIRLV

>mmuCc127a  
STSCCTQLYRQPLPSRLRRIVHMELQEADGDCHLQAVVLHLARRSVCVHPQNRSLARWLERQ

>mmuCc121b  
GQDCCLKYSQKKIPYSIVRGYRKQEPSLGCPIPAILFLPRKHSKPELCANPEEGWVQNLMRRL

>mmuCc119b  
AEDCCLSVTQRPIPGNIVKAFRYLLNEDGCRVPAVVFTTLRGYQLCAPPDQLWVDRIIRRL

>mmuCc121d  
GQDCCLKYSQKKIPYSIVRGYRKQEPSLGCPIPAILFLPRKHSKPELCANPEEGWVQNLMRRL

>mmuCc127c  
STSCCTQLYRQPLPSRLRRIVHMELQEADGDCHLQAVVLHLARRSVCVHPQNRSLARWLERQ

>mmuCc121c  
GQDCCLKYSQKKIPYSIVRGYRKQEPSLGCPIPAILFLPRKHSKPELCANPEEGWVQNLMRRL

>mmuCc119c  
AEDCCLSVTQRPIPGNIVKAFRYLLNEDGCRVPAVVFTTLRGYQLCAPPDQPWVDRIIRRL

>mmuCc127b  
STSCCTQLYRQPLPSRLRRIVHMELQEADGDCHLQAVVLHLARRSVCVHPQNRSLARWLERQ

>mmuCc121e  
GQDCCLKYSQKKIPYSIVRGYRKQEPSLGCPIPAILFLPRKHSKPELCANPEEGWVQNLMRRL

>mmuCc119  
AEDCCLSVTQRPIPGNIVKAFRYLLNEDGCRVPAVVFTTLRGYQLCAPPDQPWVDRIIRRL

>mmuCc121a  
GQDCCLKYSQKKIPYSIVRGYRKQEPSLGCPIPAILFSPRKHSKPELCANPEEGWVQNLMRRL

>mmuCc126  
AMSCCPNFSYYVIPWSWVYSYKFTDKSCTSDGVIFFTKTKGQFCVQPGAKWVQRFISLV

>mmuCc124  
PSSCCTSFISKIPENRVVSYQLANGSICPKAGVIFITKKGHKICTDPKLLWVQRHIQKL

>mmuCc120  
NYDCCLSYIQTPLPSRAIVGFTRQMADEACDINAIIFHTKKRKSVCADPKQNVVKRAVNLL

>mmuCc125  
FEDCCLGYQHRIKWNVLRHARNYHQEVSQSNLRAVRFYFRQKVVCGNPEDMNVKRAMRIL

>mmuCc128  
ASSCCTEVSHHVSGRLLERVSSCSIQRADGCDLAAVILHVKRRRICISPHNRTLKQWMRAS

>mmuXc11

ESSCVNLQTORLPVQKIKTYIIWEGAMRAVIFVTKRGLKICADPEAKWVKAAIKTV

>rnoCxc16

ELRCVCLTLAPRINPKMIANLEVIPAGPHCPKVEVIAKLNQKDNVCLDPEAPLIKKVIQKI

>rnoCxc17

ELRCRCTNTLSGIPLNSISRVNVFRPGAHC DNVEVIA TLKNGKEVCLDP TAPMIKKIVKKI

>rnoCxc14

DLSVCVVKTSSSR IHLKRITSLEVIKAGPHCAVPQLIATLKN GSKI CLDRQVPLYKKI IKKL

>rnoCxc13

ELRCQCLKTLPRVDFENIQSLTVTPPGPHCTQTEVIA TLKDGQEVCLNPQAPRLQKI IQKL

>rnoCxc115

ELRCQC IQITSE SIPCKFIKTIEVIYENIY CNRMEVIAVLRDGNAI CLHPNSTCVRTLIDNI

>rnoCxc11

ELRCQCLQTVAGIHFKNIQSLKVMPPGPHCTQTEVIA TLKNGREACL DPEAPMVQKIVQKM

>rnoCxc12

ELRCQCLTTLPRVDFKNIQSLTVTPPGPHCAQTEVIA TLKDGHEVCLNPEAPLVQRIVQKI

>rnoCxc19

NQRCS CISTSQGTFHYKSLKDLKQFAPSPNCNKTEI IATLKN GDQTC LDPDSARVKKLMKEW

>rnoCxc110

TVRCTC IDFHEQPLRPRAIGKLEI IPASLSCP HVEI IATMKKNNEKRCLNPESEAIKSLKAV

>rnoCxc111

GGRCLC IDRGVKKVVKMAAIKEVSVIYPSNGCDKVEV I VTLKAHKGQRCLDP TSKQARLIMQTI

>rnoCxc113

NLKCRC SKVSSTFINLILVDWIQVIRPGNGCPKTEI I FWTKAKKAI CVNPTARWLPKVLKFV

>rnoCxc112

SYRCP CRFFESHVARANVKHLKILNTPNCALQI VARLKSNNRQVC IDPKLKW IQEYLDKA

>rnoCxc114

gSKCKCSRKGP KIRYSDVKKLEMKPKYPHCEEKMI IITTKSMSRYRGQEHCLHPKLQSTKRFIKWY

>rnoCxc116

AGSCYCDRTIPSGTQIPPATLNHMRKYLKTFHRCOFFIRFQLQSKSVCGGSQDQWVRELVNCF

>rnoCxc117

GQECDC KDWSLRVSKRKT TAVLEPPRQCP CDHVKGSEKKNRRQKHHRKSQRPSRTCQQFLKRCQ

>rnoCc12

PLTCCYSFTGKMIPMSRLENYKRITSSRCPKEAVV FVTKLKREI CADPNKEWVQKYIRKL

>rnoCc17

SSTCCYVKKQKIPKRNLKSYRKITSSRCPWEAVIFKTKKGMEVCAEAHQWVEEAIAYL

>rnoCc111

PTSCCF TMTSKKIPNTLLKSYKRITNNRCTLKAI VFKTKLGKEI CADPKKKWVQDATKHL



>rnoCc112  
PVTCCYNVAKQKIHRRRLKSYRKITSSQCPREAVIFRTVLDKELCADPKEKWWKDSMNHL

>rnoCc11  
SSRCCCLNTLENKIALKFIKCYKEIGPSCPYPYPAVIFRLIKGRESALTNNTTWWQDYLKKV

>rnoCc15  
TTPCCFAYLSLALPRAHVKEYFYTSSKCSNLAVVFVTRRRNRQVCANPEKKWVQEYINYL

>rnoCc19  
SSDCCLSYTSRVHCSTRYKNYFPTSGGCTKPAIIFVSKKGTLVCANPSDLRVQKCIKRL

>rnoCc16  
SSDCCFSYASQIPCSRFIYYFPTSGGCTKPGIIFVTRKRKRVCANPSDQRVQTCISTL

>rnoCc13  
PTACCCFSYGRQIPRKFIADYFETSSLC SQPGVIFLTKRNRQICADPKETWVQEYITEL

>rnoCc14  
PTSCCFSYTSRKIHRNFVMDYYETSSIC SQPAVVFLLTKKGRQICADPSEPWWNEYVNDL

>rnoCc122  
DSICCCQDYIRHPLPPRFVKEFYWTSKSCRKPGVVLITIKNRDICALPRMLWVKKILHKL

>rnoCx3c11  
MTKCNITCHKMTSPIPVTLIIHYQLNQESCGKRAIILETRQHRHFCADPKEKWWQDAMKHL

>rnoCc117  
GRECCLDYFKGAIPIRKLVTFWRTSVECPRDAIVFETVQGRLIC TDPKDKHVKKAIRHL

>rnoCc127  
STS CCTQLYRQPLPTRLLRRIVRVELQEADGDCHLQAVVLHLTRRSVCVHPQNRSLARWLERH

rnoCc119  
AEDCCLSVTQRPIPGNIVKAFRYLLIQDGRVPAVVF TTLRGYQLCAPLDQPWVERIIRRL

>rnoCc121  
GQDCCLRYSQKKIPYNIVRGYRKQEPSLGCPIPAIILFAPRKQSQPELCANPEEAWVQKLMRRL

>rnoCc126  
PMPCCSYFSHYVIPWHWLYSYQITDSSCPNEGVI FTTKTKGQYCVQPGDKWVQRYISLL

>rnoCc124  
PSSCCVTFISKKIPVNRVISYQLANGSICPKAGVIFITKKGHKICTDPKLPWVQKHINKL

>rnoCc120  
NFDCCLTYYTKNVYHHARNFVGF TTMADAEACDINAIIFHLKSKRSVCADPKQIWWKRILHLL

>rnoCc125  
FEDCC LGYQPRIKWNVLRHARHYHQEQEVSGSCNLRAVIFYFRQKVVVCGNPEDKDVKRAVKIL

>rnoCc128  
ASSCCTEVSHHIPPRLLE RVNSCSIQRADGCDLAAVILHVKRRRICVSPHNPTLKRWMSAS

>rnoXc11  
ESICVSLRTQRLPVQKIKTYTIKEGAMRAVIFVTKRGLRICADPQAKWVKTAIKTV

>ocuCxc18

ELRCQC IKTHSTPFHPKFIKELRVIESGPHCANSEIIVKLV DGRELC LDPKEK WVQKVQIF

>ocuCxc16

ELRCVCLSTTAIHPKMIARLQVIAAGPQCSKVEVVASLKNNGKEICLDPEAPLIKKAIQKI

>ocuCxc14

DLHCVCVKTTSLVRPRHITNLELIKAGAHCP TAQLITLKNGRKLC LDQAALYKVKVIKLL

>ocuCxc13

ELRCQCLQTVQGIHLKNIQNLKVLSPGPHCAQTEVIATLKSQGEACL NPAAPMVKKFLQKR

>ocuCxc115

ELRCQCIQIYSNFISP KLIK NVQMIPSGPYCSTKEVI VTLKDGRLIC LDPEAEWVMTLIKNT

>ocuCxc11

ELRCQCLQTVQGIHLKSIQSLKVLSPGPHCAQTEVIATLKSQGEACL NPAAPMVKKFLQKR

>ocuCxc12

ELRCQCLQTVQGIHLKSIQSLKVLSPGPHCAQTEVIATLKSQGEACL NPASPMVKKLLQKM

>ocuCXCL9

NGRCSCISSTQGKIHLQSLKDLKQFSPSPSCGKTEI IATKKDGTQIC LNPDSTEVKELVEKW

>ocuCXCL10

TVRC TCINISNKPVNPRSLEKLEIIPASQSCANVEI IATMKKDG EKRC LNPELKA IKLLKAF

>ocuCXCL11

GGRCLCTGPGVKAVKVADVQKATI IYPSGSCDKTEVI IITLAKKGGQQCLNPRSKQASLI IKQI

>ocuCXCL13

DLKCECVQETANYIPIRFIDRLQIVPPGNGCPKREVI VWLKT K IAVCVKPHAKWLQKLIQIL

>ocuCXCL16

TGSC HCDQI I SSSSPNP KLM EHF RKHL RAYHRC TAYIRFRLHSRSVCGGNHDPWVHELLRCF

>ocuCXCL17

GQCECKG WFLRAPKRKLM TVPRLPKKHCP CDHF KGT VKKTRHQKSHRQPNKHSRACQOFLKRCQ

>ocuCc12

PVTCCYTF TSKTISVKRLMSYRRINSTKCPKEAVI FMTKLAKGICADPKQK WVQDAIANL

>ocuCc17

GKTCCYRFHNRMDPQKLRSYTLISISYCPREAVI FFKTKQHREVCADPKWPWAQNAIAYL

>ocuCc111

PTTCCFSMAKKMPLQRLESYRRISGSKCPQKAVI FFKTKLAKEICADPKEK WVQDSIKYL

>ocuCc113

LTACCF SFVRKRIPLQRLVSYRKTSKACVKEAVI FRTRRDQELCADPMQK WVQDTMRVL

>ocuCc11

SSNCCFSFVEKRIPLKTIHCYRRSSSTCPYDAI IFKLRGGRES CALKTVGWLQGYFKM

>ocuCCL5

TTPCCFAYISRLLPRAHVTEYFYTSKGCSFPAV V FVTRKNRQVCANPEKK WVREYINSL

>ocuCCL14  
PAECCFSYITRVVPRQRITDYETSSSECSKPGIVFITKKGYSICANPRDDWVQDYIRDL

>ocuCCL15  
PSDCCYGYTTRPLQCSVMEDFFETNSQCSMPAVIFITKCGKLICANPRNNEVEECMETL

>ocuCCL23  
PTDCCFSYTKRNIQCFLMQDYIETSSQCSMPAVIFLTKRGQKVCADSSDERVRKCVSSL

>ocuCCL3  
PTACCCFSYISRQIPYKFIADYFETSSQCSKPGVIFLTKRGRQVCADISEAWVQGYINDL

>ocuCCL4  
PTACCCFSYTLRQLPRHFVIDYFETSSICSQPAVVFQTKKGRQVCANPSESWVQEYVDDL

>ocuCCL22  
DSVCCRDYMRRLAPRVVKYFYWTSDSCRRPGVVLVTLKGLEICADPRLPWVKKILRKL

>ocuCX3CL1  
VAKCSIICNNMTPKIPVALLISYQWNQESCGKPAIVLETKRHKRF CADPQAPWVQEAMKHL

>ocuCCL27  
STTCC TQLYRQPLSNKLLRKVIRVELQEADGDCHLQAFVLHLARRSVC IHPQNRSLARWFERO

>ocuCCL19  
AEDCCLSVTQRPIPSNIVRAFRYLLVTDGCRVPAVVF TTLRGFQLCAPPEQPWVGRIIRRL

>ocuCCL21  
AQDCCCLKYSLRKIPHKVVRSYRKQEPSLGCPI SAILFSPRKRSQPEL CADPKEPWVQQLMKRL

>ocuCCL24  
PSSCCMNFIPKKIPESQVVSQYLSSGSVCPRAGVIF TTKKGYRVC GDPKQWVQSYVRNL

>ocuCCL20  
NFDCC LRYTECRIHPRFIVGFTQQLANEACDINAI I LH TKNLSVCADPKKEWVKRVVHIL

>ocuCCL25  
SEDCC LAYHSLSWAVLQRTQGYQLQEVSGS CNLRAVRFCLKHRIVCGNPQDKKQRAVKLL

>ocuCCL28  
FSSCCTEVSPHLSRRLKLVHTCHLQRADGDCDLDAVALYFGRRRF CVT TENHMLKEWMKAQ

>ocuXCL1  
KSI CVSLTTQPLPVNRIRTYTIKEGPMKAVIFITKRGLKVCADPQAKWVKTAIKSI

  

>cpoCxc18  
ELRCQC IKIHTTTPFHPKFIKELKVIESGPRCANSEI I VKLSDNRQLCLDPKKKQWVQDVSMF

>cpoCxc16  
ELRCVCVTITPGVHPKMIASLQVTVSGPQC PNVEVVATLKNKQICLDPEAPLIKRVIQKM

>cpoCxc17  
ELRCVCLSTTAIHPKMIARLQVIAAGPQC SKVEVVASLKNKKEICLDPEAPLIKKAIQKI

>cpoCxc11  
ELRCRCRLRPVRLGHPKNIQSVAVTAPGPHCHQTEVVLATLKDGREACLDPPEAPMVQKVLQRM

>cpoCxc19  
KGRCYCINSSDDVISLKSLKDLKQFVSPSPCEKTEI IATKRNGDQTCLNPDSTKVKKLIKQW

>cpoCxc110  
TIRCTCIETSTQPVNPKSFKKLEIIPASQSCPRVEI IATMKMNGEKRCALDPESKVIKLNLLKAV

>cpoCxc111  
RGRCLCIGPGLRAVKVADIKASIIYPSNSCDKIEVIITLKAHKGQRCLNPRSKQAGLI I KQV

>cpoCxc113  
NLKCRCMQETSQVVRIPNIHRLRILPPGNGCPKTQI I IQLRNKTLVCLNPAAKWVQFVARV

>cpoCxc112  
SYRCPFRFFESHVARANVKHLKILNTPNCALQIVARLKNNNRQVCIDPKLKWIQEYLEKA

>cpoCxc117  
SRECECKDWFQRALRRKPMTPALPKKQPCDHLKVNMMKSRHHKHQRKPNKHSRACQEF LKQCQ

>cpoCc12L  
TPICCYVFNRKIPLKRVRGYERITSSRCPQEAVIFRTLKNKEVCADPTQKWWQDYIAKL

>cpoCc12  
TPTCCYTFNKQIPLKRVKGYERITSSRCPQEAVIFRTLKNKEVCADPTQKWWQDYIAKL

>cpoCc17  
ISTCCYKRSQRIRVQRLESYTRITSSKCPWQAVIFKTKFNREICADPKQQWVQDSMKYI

>cpoCc111  
PSACCFRVTNKKISFQRLKSYKIITSSKCPQTAIVFEIKPKMI CADPKKKWVQDAKKYL

>cpoCc113  
PLACCLTLTHRKIPLNYLKGVELTSDKCPLTAVIFKTRRNIQICADPTKKWVQHAMVYL

>cpoCc11  
SSRCCYSFVERKISHHRIQSYKGTSSSCPYEAVIFKLGKGREICALKTIEWVQDYLTCK

>cpoCc15  
TTPCCFAYISRALPRTHIKEYFYTSSKCSNLAVV FVTRKNRQVCANPEKKWVREYINSL

>cpoCc114  
PSECCFSYITHAVLPYRIMGYYETNGDCPKPAVVFITTKGHRI CANPENEWVQDY LKDL

>cpoCc115  
PADCCFSYTSRKIQCRLMEDYFRTSSGCPRPGVIFLTKKGKLV CADPSDRRVQDCIRNL

>cpoCc123  
PADCCFSYTSRKIQCRLMEDYFRTSSGCPRPGVIFLTKKGQLV CADPSDRRVQDCIRNL

>cpoCc1N1  
PSDCCISFVTHQIPKNQVVAYIRPMACASNTVFLTKTRKYI CANPSDHWVQDYIRKL

>cpoCc13a  
PTACCCFFIFSRKIPRKFVVDYETSSQCPKAAVIFQTKRGREVCADLRDTWVHEYIADL

>cpoCc13b  
PTACCFYASKKIPRAYVADYYETSSQCSQPGVIFITKRGREVCADPNETWVQDYINDL

>cpoCc13c  
PTACCFTYASKKIPRAYVADYYETSSQCSQPGVIFITKRGREVCADPNETWVQDYINDL

>cpoCc14a  
PTACCFTYTQQRKLPNRFVTDYYETSSLCSQPAVVFQTKRGKQVCANPSDSWVQEYVEYL

>cpoCc122  
DSICCRDFVRYPLPPRVVKDFYWTSDSCRRAGVVLQTVKDREICANPKLPWVKKILQKL

cpoCx3c11  
VVKCSNICDKMTSRIPNHLLLLGYRLNQASC DKPAVIFETKKHRFFCADPKEKWVQEARWHL

>cpoCc117  
GRECCLDYFKGAIPIRKLVSWYRTSDECPKDAIVFETVQNRRI CSNPEDRHVKKAVRHL

>cpoCc127  
ITTCCTQLYRRPLPNKILRKVIWVELQEADGDCHLQAFVLYLTERSVCVHPKNRSLIQWLERH

>cpoCc119  
AEDCCLSVTLRPIPGNIVKAFRYLFITDGC RVPVAVFTTLRGHQLCAPPEQPWVQRIIRRL

>cpoCc121  
AQDCCCLKYSQKKIPYKVVRSYRKQELSLGCPMPAILFLPKKRSQPEL CADPKEAWVQQLMKRL

>cpoCc126  
AEVCCFHYSTKALPVSWSYKLTRSSCSCQAVIFTTKRGKQVCFRPKAKWVQQYIS

>cpoCc120  
SFDCCLRVTRHVLSPKLIVGFTQQLASEACDIDAIIFHTKKRLSVCADPKKGWVKRAVLVL

>cpoCc125  
SEDCCLAYHPPLRLSVFLHARYFRWQEVSGSCNLPAVIFHFPPQGRVVCGNPRDKVVRKAMRVL

>cpoCc128  
ASSCCTEVSHRISRLLERVTVCRIQRADGCDLAAVILHVKRRRICISPNNHTVNQWMKAQ

>cpoXc11  
SSVCM SLRVHPLPLNRIKTYTIKEGPMRAVIFITKRELKVC AHPEATWVKKALKSI

>cpoXc12  
RSVCVSLTTQRLPVNRIKTYTIKEGSMKAVIFITKRGFKICANPEDSWVKA AVRTI

>itrCxcl8  
ELRCQCIKTHSTPFHPKYIKELRVIESGPHCANSEIIVKLVDGRELCLNPKEKWVQKVVELF

>itrCxcl6  
ELRCVCLSTTPGIHPKMVTNLQVIAAGPQCPKVEVVASLNGKEVCLDPEAPLIKKIIQKI

>itrCxcl7  
ELRCICVKTISGIHPSNIQNLEVIRPGAHCAKVQVIATLKDGREICLDPEAPRVKKIIQKL

>itrCxcl4  
EFQCMCAKTRYKVKVKDITNLEMIPGPLICATTQM IATLKS GSRVCLAGQVSFFKALIGKL

>itrCxcl4L  
DSHCVCVKTKSKVNAENIFKLEVIKAGPHCATAQMIATLKSGRKI CLDRQVSLFKRLMKKL

>itrCxcl3  
ELRCQCLQTVQGIHLKNIQSVKVMSPGPHCAQTEV IATLKNQGEACL NPEAPLVKKI IHKM

>itrCxcl15  
ELRCRCIQTHSDFISPOF IETLQLIPEGVQCSRKEI I VTLKDGQLVCLDPEAKWVKTLLKLV

>itrCxcl1  
ELRCQCLQTVQGIHLKNIQSVKVTSPGPHCAQTEV IATLKNQGEACL NPEAPLVKKI IDKM

>itrCxcl9  
NDR CSCISTRQGIHPKALKDIKQFAPSPSCGKTEI IATMKNGNEECLNPDSGYVKKVVKMW

>itrCxcl10  
TTRCKCIQISNRPVNPKSLEKLELIPASESCPRVEI IATMKKSGEKRC LNPESKAIKNLLKAL

>itrCxcl11  
GGRCLCIGPGVKAVKFTDIEKASVIYPSNSCNKIEVI IITLKAHKGQRCLNPRSKQASFI IKQV

>itrCxcl13  
NLK CSCVQGTSDFIHVRQIGRLQI IPPGNGCPIKQI IIRLKNKT TVCVNPQTSWIKKLIEHL

>itrCxcl12  
SYR CPCRFFESHVARVNVRLKILNTPNCSLQI VARLKSNNRQVCIDPKLKW IQEYLEKA

>itrCxcl14  
gSKCKCSRKGPKIRYSDVKKLEMKPKYPHC EEKMI IITTKSVSRYRGQEHCLHPKLQSTKRFIKWY

>itrCxcl16  
TGS CPCDERISNNPLSWQIMDHRYKYL RAYRDCPPYIRFELIRKSVCGS IKNPSVRELMSCF

>itrCxcl17  
SQE CEC KDWFLRASKKKPMTEAGLPKKRCP CDHSTVGVKKTRHRRHHKKS NKHSAKWQFLQRCQ

>itrCcl2  
PVT CCYTTLTSRKIPMKRLMSYRRVTSSKCPKEAVI FTTVLNKEI CADPLQK WVEDYVAKM

>itrCcl7  
IST CCFETRRRKVSVQKLKSYTRITSSTCPREAVI FQTKLNKEI CADSNQQWVKDAIKHL

>itrCcl11  
PTT CCFTVANKKFSIQRLESYRKITGSKCPQKAVI FFKTKQDKEFCADPKQK WVKDAIKYL

>itrCcl12  
PIT CCFSTINRRIP IQKLQSYTITSTQCPKVAVI FFKTKRGKMICADPSEN WVKDSMTLL

>itrCcl1  
SSR CCF SFAQKRISQKTIQCYRETSSTCPYQAAI FRLKGGRES CALKTERWVQGYLGKV

>itrCcl5  
TTP CCFAFISRPVPRNHIKEYFYTSSKCSNLAVV FVTRRRNRQVCADPEKK WVREYINSL

>itrCcl16  
QAS CCV TYEKTLPQKLVKGYREALTCHLP AII FVTKKNREVCANPNDS WVDYIKDP

>itrCcl14  
PSE CCF TYVSQAPRRRIIDYYETSSECPKSGI VFITKKGHPICANPKDE WVDYIKEL

>itrCcl15  
PADCCFSYITRRSIRCTVMKTYHKTSSGCSQPAVIFITNKGQHVCANPNDPSVQECMKKL

>itrCcl23  
AADCCFIYTRRSIRCSFMEHYKTSSTGCPQPAVIFFSRKGQRICADPNDGRVQECMANL

>itrCcl3a  
PSFCCFAYTSRKIPPKFVAFYETSSSTCSSKGI V FVTKRGRHVCARPNEAWVQEHIRDL

>itrCcl3b  
PTACCCFFYISRKIPHKFVDDYETSSQCSKPAVIFQTKRGRQVCADPSEAWVRAYITDL

>itrCcl3c  
PTACCCFSYVARQIQRFIEDYFETSSQCSQPGVIFLTKRGRQVCADPSENWVQEYITDL

>itrCcl4  
PTACCCFSYTLRKLPRNFVMDYFETSSLCSQPAVVFQTKKGRQVCANPSESWVQEYMDDL

>itrCcl22  
DSICCRDYIRLPLPQRLVKSFYWTSESARRPGVVLQTLRDREICANPKLPWVKRIQKL

>itrCx3c11  
VTKCNITCNTMTRPIPVNLLIGYWKNPESCGRAV V LETKRHKYFCADPKEK W V QEAMKHL

>itrCcl17  
GRECCMEFFKGAIPIRKLVTWYRTSAECPKDAI V LVMTMQKSI CSDPKDRH V TKAVRFL

>itrCcl27  
STTCC T QLYRQPLSKLLRQVIRVELQEADGDCHLQAF V LHLARRSVC IHPQNRSLARWFERQ

>itrCcl19  
AEDCCLSVTQRPIPRNIVKAFRYLLLTDGCRVPAV V FTTLRGHEL CAPPDQP W VDRIIRRL

>itrCcl21  
AQDCCLKYSQRKIPYKVVRYRQYEQEASLGCPIPAI L FLQPQRSQPEL CGDPKEA W V QQLMKRL

>itrCcl24  
PFSCCFNFTAKKIPQKRVVSYQLTSGSTCVQAGVIFTTTAGRKVCADPSQL W V QEYKKNL

>itrCcl26  
EKSCCFQYSHKMIPWNWVQAYQFTQISCPQQGVIFTTKIGERV V QPKEK W V QRYISLL

>itrCcl20  
NFDCC LRYTEKVFHHRFLVGF T QQLANEACDIDAVIFYTKRKLAVCADPKKP W V KTAVRRL

>itrCcl25  
FEDCC LGYYPKPKLAVLRRASFYRIQEVS GSNLFAI V FYFRQPGKMVCGNPRDIR V RKAMRLV

>itrCcl28  
ASSCCTEVSHHISRLLERVNSCRIQRADGDCDLAAVILHIKRRRI CVSPHNHTIKQWIRAQ

>itrXcl1  
KSVCVSLSTQRLPINRIRTYTIKEGSVKAVIFITRRGLKVCANPEAE W V KSAVKSV

# Phylogenetic Tree of Rodents, Rabbit and Human Chemokines

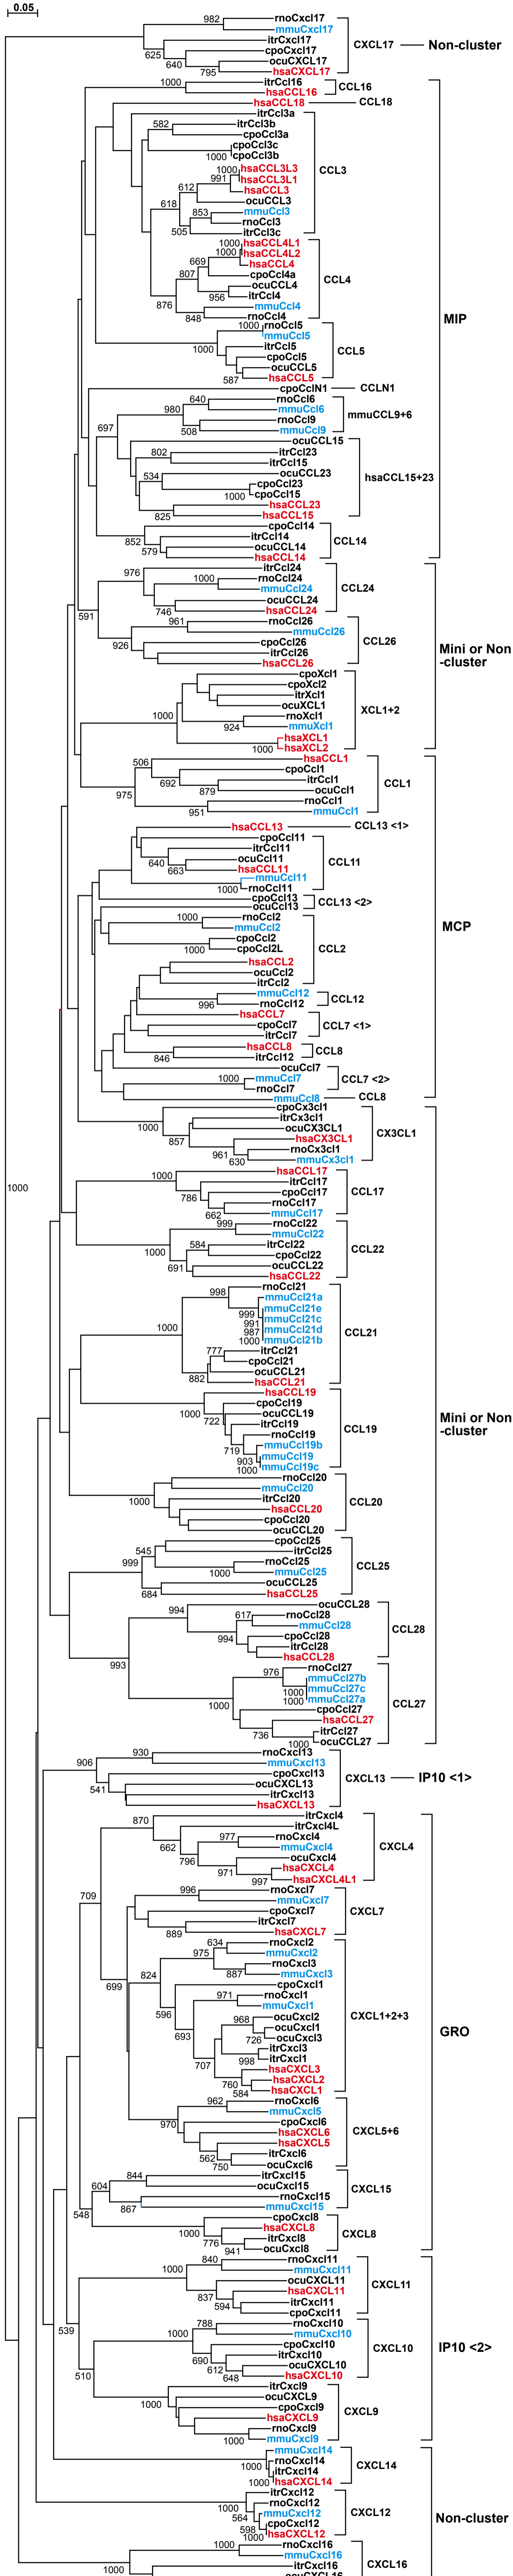

hsa : Human  
 mmu : Mouse  
 rno : Rat

itr : Squirrel  
 cpo : Guinea pig  
 ocu : Rabbit

\* itrCxc12 was omitted from this analysis
